# Supplementary material for: Switching of RNA splicing regulators in immature neuroblasts: a key step in adult neurogenesis
Source: bioRxiv preprint, doi:10.1101/2023.03.12.532290, version 2 (2023-12-05)
Supplement: supp_data6 [file 532290_file04.xlsx]

## Sheet: Gene_list_DCXHigh
Gene list of iNB_DCXHigh cells
gene	p_val	avg_log2FC	pct.1	pct.2	p_val_adj	external_gene_name	description
ENSMUSG00000023800	1.47172e-197	1.37467	0.884	0.393	2.80466e-193	Tiam2	T cell lymphoma invasion and metastasis 2 [Source:MGI Symbol;Acc:MGI:1344338]
ENSMUSG00000022044	4.75469e-129	1.1668	0.758	0.338	9.06101e-125	Stmn4	stathmin-like 4 [Source:MGI Symbol;Acc:MGI:1931224]
ENSMUSG00000041362	1.19967e-123	1.34522	0.662	0.246	2.28621e-119	Shtn1	shootin 1 [Source:MGI Symbol;Acc:MGI:1918903]
ENSMUSG00000070880	2.99641e-117	0.95673	0.581	0.177	5.71026e-113	Gad1	glutamate decarboxylase 1 [Source:MGI Symbol;Acc:MGI:95632]
ENSMUSG00000006651	2.76557e-119	0.802124	0.769	0.367	5.27035e-115	Aplp1	amyloid beta (A4) precursor-like protein 1 [Source:MGI Symbol;Acc:MGI:88046]
ENSMUSG00000048562	6.39049e-102	1.01199	0.649	0.268	1.21783e-97	Sp8	trans-acting transcription factor 8 [Source:MGI Symbol;Acc:MGI:2443471]
ENSMUSG00000052516	2.90777e-89	0.862177	0.513	0.164	5.54133e-85	Robo2	roundabout guidance receptor 2 [Source:MGI Symbol;Acc:MGI:1890110]
ENSMUSG00000020181	4.26901e-81	0.634523	0.454	0.128	8.13546e-77	Nav3	neuron navigator 3 [Source:MGI Symbol;Acc:MGI:2183703]
ENSMUSG00000033740	2.9188e-73	0.777762	0.54	0.217	5.56237e-69	St18	suppression of tumorigenicity 18 [Source:MGI Symbol;Acc:MGI:2446700]
ENSMUSG00000074657	2.94534e-75	0.62124	0.574	0.251	5.61294e-71	Kif5a	kinesin family member 5A [Source:MGI Symbol;Acc:MGI:109564]
ENSMUSG00000047261	6.27433e-77	0.774707	0.612	0.292	1.1957e-72	Gap43	growth associated protein 43 [Source:MGI Symbol;Acc:MGI:95639]
ENSMUSG00000022012	1.89302e-72	0.639742	0.551	0.242	3.60753e-68	Enox1	ecto-NOX disulfide-thiol exchanger 1 [Source:MGI Symbol;Acc:MGI:2444896]
ENSMUSG00000038349	5.71707e-69	0.650106	0.57	0.263	1.0895e-64	Plcl1	phospholipase C-like 1 [Source:MGI Symbol;Acc:MGI:3036262]
ENSMUSG00000066800	1.20931e-65	0.572248	0.548	0.242	2.30459e-61	Rnasel	ribonuclease L (2', 5'-oligoisoadenylate synthetase-dependent) [Source:MGI Symbol;Acc:MGI:1098272]
ENSMUSG00000085271	1.08472e-72	0.572645	0.444	0.138	2.06715e-68	E130006D01Rik	RIKEN cDNA E130006D01 gene [Source:MGI Symbol;Acc:MGI:2685527]
ENSMUSG00000031840	4.67694e-66	0.549303	0.605	0.304	8.91285e-62	Rab3a	RAB3A, member RAS oncogene family [Source:MGI Symbol;Acc:MGI:97843]
ENSMUSG00000028076	2.38734e-65	0.574908	0.618	0.323	4.54956e-61	Cd1d1	CD1d1 antigen [Source:MGI Symbol;Acc:MGI:107674]
ENSMUSG00000029168	3.10947e-74	0.691019	0.667	0.373	5.92572e-70	Dpysl5	dihydropyrimidinase-like 5 [Source:MGI Symbol;Acc:MGI:1929772]
ENSMUSG00000037887	2.62137e-64	0.676675	0.651	0.367	4.99554e-60	Dusp8	dual specificity phosphatase 8 [Source:MGI Symbol;Acc:MGI:106626]
ENSMUSG00000022505	1.40762e-60	0.678853	0.529	0.249	2.6825e-56	Emp2	epithelial membrane protein 2 [Source:MGI Symbol;Acc:MGI:1098726]
ENSMUSG00000036036	2.40619e-63	0.583695	0.638	0.358	4.58548e-59	Zfp57	zinc finger protein 57 [Source:MGI Symbol;Acc:MGI:99204]
ENSMUSG00000058589	8.50154e-60	0.634619	0.448	0.173	1.62014e-55	Anks1b	ankyrin repeat and sterile alpha motif domain containing 1B [Source:MGI Symbol;Acc:MGI:1924781]
ENSMUSG00000035835	8.40331e-56	0.518373	0.578	0.308	1.60142e-51	Plppr3	phospholipid phosphatase related 3 [Source:MGI Symbol;Acc:MGI:2388640]
ENSMUSG00000021614	4.77669e-68	0.88649	0.658	0.393	9.10294e-64	Vcan	versican [Source:MGI Symbol;Acc:MGI:102889]
ENSMUSG00000040158	5.68173e-58	0.527823	0.655	0.397	1.08277e-53	Tax1bp3	Tax1 (human T cell leukemia virus type I) binding protein 3 [Source:MGI Symbol;Acc:MGI:1923531]
ENSMUSG00000020723	6.37883e-51	0.553422	0.528	0.275	1.21561e-46	Cacng4	calcium channel, voltage-dependent, gamma subunit 4 [Source:MGI Symbol;Acc:MGI:1859167]
ENSMUSG00000019891	1.93263e-48	0.498851	0.578	0.326	3.68301e-44	Dcbld1	discoidin, CUB and LCCL domain containing 1 [Source:MGI Symbol;Acc:MGI:1913936]
ENSMUSG00000026688	8.10292e-53	0.517133	0.595	0.345	1.54417e-48	Mgst3	microsomal glutathione S-transferase 3 [Source:MGI Symbol;Acc:MGI:1913697]
ENSMUSG00000004031	2.36172e-49	0.5285	0.416	0.172	4.50073e-45	Brinp2	bone morphogenic protein/retinoic acid inducible neural-specific 2 [Source:MGI Symbol;Acc:MGI:2443333]
ENSMUSG00000029754	4.2075e-35	0.38276	0.622	0.381	8.01823e-31	Dlx6	distal-less homeobox 6 [Source:MGI Symbol;Acc:MGI:101927]
ENSMUSG00000029810	1.35522e-43	0.487815	0.496	0.256	2.58264e-39	Tmem176b	transmembrane protein 176B [Source:MGI Symbol;Acc:MGI:1916348]
ENSMUSG00000046709	1.63092e-46	0.467953	0.428	0.19	3.10805e-42	Mapk10	mitogen-activated protein kinase 10 [Source:MGI Symbol;Acc:MGI:1346863]
ENSMUSG00000048385	4.12009e-43	0.435969	0.517	0.279	7.85165e-39	Scrt1	scratch family zinc finger 1 [Source:MGI Symbol;Acc:MGI:2176606]
ENSMUSG00000020135	3.82172e-47	0.462729	0.429	0.192	7.28304e-43	Apc2	APC regulator of WNT signaling pathway 2 [Source:MGI Symbol;Acc:MGI:1346052]
ENSMUSG00000025789	8.99544e-46	0.488757	0.545	0.311	1.71426e-41	St8sia2	ST8 alpha-N-acetyl-neuraminide alpha-2,8-sialyltransferase 2 [Source:MGI Symbol;Acc:MGI:106020]
ENSMUSG00000021268	2.70613e-46	1.26884	0.436	0.203	5.15706e-42	Meg3	maternally expressed 3 [Source:MGI Symbol;Acc:MGI:1202886]
ENSMUSG00000074622	2.10921e-43	0.433235	0.593	0.36	4.01953e-39	Mafb	v-maf musculoaponeurotic fibrosarcoma oncogene family, protein B (avian) [Source:MGI Symbol;Acc:MGI:104555]
ENSMUSG00000020315	4.20143e-43	0.561316	0.534	0.304	8.00666e-39	Sptbn1	spectrin beta, non-erythrocytic 1 [Source:MGI Symbol;Acc:MGI:98388]
ENSMUSG00000047414	5.12773e-43	0.624782	0.488	0.262	9.77191e-39	Flrt2	fibronectin leucine rich transmembrane protein 2 [Source:MGI Symbol;Acc:MGI:3603594]
ENSMUSG00000022577	7.90366e-39	0.470752	0.429	0.205	1.5062e-34	Ly6h	lymphocyte antigen 6 complex, locus H [Source:MGI Symbol;Acc:MGI:1346030]
ENSMUSG00000068735	1.00758e-34	0.38819	0.531	0.316	1.92014e-30	Trp53i11	transformation related protein 53 inducible protein 11 [Source:MGI Symbol;Acc:MGI:2670995]
ENSMUSG00000037771	2.68052e-34	0.364181	0.436	0.222	5.10827e-30	Slc32a1	solute carrier family 32 (GABA vesicular transporter), member 1 [Source:MGI Symbol;Acc:MGI:1194488]
ENSMUSG00000033578	2.30573e-35	0.400354	0.49	0.279	4.39403e-31	Tmem35a	transmembrane protein 35A [Source:MGI Symbol;Acc:MGI:1914814]
ENSMUSG00000055717	5.51303e-39	0.501743	0.572	0.367	1.05062e-34	Slain1	SLAIN motif family, member 1 [Source:MGI Symbol;Acc:MGI:2145578]
ENSMUSG00000029712	3.28383e-32	0.34433	0.432	0.229	6.258e-28	Actl6b	actin-like 6B [Source:MGI Symbol;Acc:MGI:1933548]
ENSMUSG00000037664	1.58118e-31	0.394284	0.43	0.232	3.01326e-27	Cdkn1c	cyclin-dependent kinase inhibitor 1C (P57) [Source:MGI Symbol;Acc:MGI:104564]
ENSMUSG00000084946	6.26415e-33	0.411673	0.589	0.394	1.19376e-28	Dlx1as	distal-less homeobox 1, antisense [Source:MGI Symbol;Acc:MGI:1195983]
ENSMUSG00000031626	1.56063e-34	0.534842	0.481	0.287	2.9741e-30	Sorbs2	sorbin and SH3 domain containing 2 [Source:MGI Symbol;Acc:MGI:1924574]
ENSMUSG00000030000	4.69572e-25	0.32306	0.506	0.326	8.94864e-21	Add2	adducin 2 (beta) [Source:MGI Symbol;Acc:MGI:87919]
ENSMUSG00000029094	1.85149e-25	0.344391	0.48	0.302	3.52838e-21	Afap1	actin filament associated protein 1 [Source:MGI Symbol;Acc:MGI:1917542]
ENSMUSG00000020668	2.04441e-24	0.302355	0.46	0.287	3.89604e-20	Kif3c	kinesin family member 3C [Source:MGI Symbol;Acc:MGI:107979]
ENSMUSG00000038170	1.26028e-28	0.447865	0.502	0.329	2.40171e-24	Pde4dip	phosphodiesterase 4D interacting protein (myomegalin) [Source:MGI Symbol;Acc:MGI:1891434]
ENSMUSG00000004798	2.03118e-24	0.342485	0.552	0.384	3.87082e-20	Ulk2	unc-51 like kinase 2 [Source:MGI Symbol;Acc:MGI:1352758]
ENSMUSG00000064115	2.82473e-23	0.402312	0.416	0.25	5.38308e-19	Cadm2	cell adhesion molecule 2 [Source:MGI Symbol;Acc:MGI:2442722]
ENSMUSG00000030272	3.02553e-23	0.320803	0.419	0.255	5.76576e-19	Camk1	calcium/calmodulin-dependent protein kinase I [Source:MGI Symbol;Acc:MGI:1098535]
ENSMUSG00000059714	1.88201e-24	0.331148	0.502	0.338	3.58654e-20	Flot1	flotillin 1 [Source:MGI Symbol;Acc:MGI:1100500]
ENSMUSG00000051527	2.0312e-21	0.333942	0.433	0.271	3.87086e-17	Usp29	ubiquitin specific peptidase 29 [Source:MGI Symbol;Acc:MGI:1888998]
ENSMUSG00000031168	2.50022e-22	0.307058	0.542	0.383	4.76467e-18	Ebp	phenylalkylamine Ca2+ antagonist (emopamil) binding protein [Source:MGI Symbol;Acc:MGI:107822]
ENSMUSG00000037235	1.31685e-22	0.331967	0.546	0.389	2.50953e-18	Mxd4	Max dimerization protein 4 [Source:MGI Symbol;Acc:MGI:104991]
ENSMUSG00000020189	1.27101e-21	0.331968	0.522	0.372	2.42216e-17	Osbpl8	oxysterol binding protein-like 8 [Source:MGI Symbol;Acc:MGI:2443807]
ENSMUSG00000038375	2.4749e-18	0.248958	0.433	0.283	4.71643e-14	Trp53inp2	transformation related protein 53 inducible nuclear protein 2 [Source:MGI Symbol;Acc:MGI:1915978]
ENSMUSG00000039770	2.11867e-17	0.266801	0.514	0.379	4.03754e-13	Ypel5	yippee like 5 [Source:MGI Symbol;Acc:MGI:1916937]
ENSMUSG00000061143	4.87772e-17	0.314492	0.481	0.348	9.29547e-13	Maml3	mastermind like transcriptional coactivator 3 [Source:MGI Symbol;Acc:MGI:2389461]
ENSMUSG00000038740	7.21891e-16	0.261137	0.459	0.329	1.37571e-11	Mvb12b	multivesicular body subunit 12B [Source:MGI Symbol;Acc:MGI:1919793]
ENSMUSG00000027669	7.40676e-15	0.267951	0.498	0.372	1.41151e-10	Gnb4	guanine nucleotide binding protein (G protein), beta 4 [Source:MGI Symbol;Acc:MGI:104581]
ENSMUSG00000037111	6.3864e-14	0.239789	0.493	0.367	1.21706e-09	Setd7	SET domain containing (lysine methyltransferase) 7 [Source:MGI Symbol;Acc:MGI:1920501]
ENSMUSG00000041594	2.07422e-12	0.23816	0.511	0.394	3.95284e-08	Tmtc4	transmembrane and tetratricopeptide repeat containing 4 [Source:MGI Symbol;Acc:MGI:1921050]
ENSMUSG00000035798	9.20678e-14	0.255656	0.47	0.354	1.75454e-09	Zdhhc17	zinc finger, DHHC domain containing 17 [Source:MGI Symbol;Acc:MGI:2445110]
ENSMUSG00000036862	1.56767e-11	0.194455	0.45	0.336	2.98751e-07	Dchs1	dachsous cadherin related 1 [Source:MGI Symbol;Acc:MGI:2685011]
ENSMUSG00000003279	6.39364e-12	0.256959	0.407	0.295	1.21844e-07	Dlgap1	DLG associated protein 1 [Source:MGI Symbol;Acc:MGI:1346065]
ENSMUSG00000031367	7.54344e-11	0.215569	0.463	0.352	1.43755e-06	Ap1s2	adaptor-related protein complex 1, sigma 2 subunit [Source:MGI Symbol;Acc:MGI:1889383]
ENSMUSG00000038831	2.03552e-12	0.228946	0.464	0.354	3.87908e-08	Ralgps1	Ral GEF with PH domain and SH3 binding motif 1 [Source:MGI Symbol;Acc:MGI:1922008]
ENSMUSG00000042726	8.39384e-12	0.242013	0.441	0.333	1.59961e-07	Trafd1	TRAF type zinc finger domain containing 1 [Source:MGI Symbol;Acc:MGI:1923551]
ENSMUSG00000043614	8.16814e-12	0.212713	0.445	0.337	1.5566e-07	Vps37d	vacuolar protein sorting 37D [Source:MGI Symbol;Acc:MGI:2159402]
ENSMUSG00000072294	6.81719e-13	0.265911	0.472	0.364	1.29915e-08	Klf12	Kruppel-like factor 12 [Source:MGI Symbol;Acc:MGI:1333796]
ENSMUSG00000026628	7.92887e-11	0.252082	0.401	0.294	1.51101e-06	Atf3	activating transcription factor 3 [Source:MGI Symbol;Acc:MGI:109384]
ENSMUSG00000009739	2.18823e-11	0.204479	0.455	0.35	4.1701e-07	Pou6f1	POU domain, class 6, transcription factor 1 [Source:MGI Symbol;Acc:MGI:102935]
ENSMUSG00000035725	4.08508e-11	0.208797	0.432	0.327	7.78494e-07	Prkx	protein kinase, X-linked [Source:MGI Symbol;Acc:MGI:1309999]
ENSMUSG00000020948	1.93024e-11	0.222467	0.466	0.363	3.67845e-07	Klhl28	kelch-like 28 [Source:MGI Symbol;Acc:MGI:1913939]
ENSMUSG00000034863	1.09182e-09	0.169982	0.416	0.314	2.08068e-05	Ano8	anoctamin 8 [Source:MGI Symbol;Acc:MGI:2687327]
ENSMUSG00000032594	4.59462e-11	0.220938	0.48	0.379	8.75596e-07	Ip6k1	inositol hexaphosphate kinase 1 [Source:MGI Symbol;Acc:MGI:1351633]
ENSMUSG00000020300	1.04737e-09	0.192988	0.46	0.36	1.99597e-05	Cpeb4	cytoplasmic polyadenylation element binding protein 4 [Source:MGI Symbol;Acc:MGI:1914829]
ENSMUSG00000028329	1.39833e-10	0.21927	0.478	0.379	2.66479e-06	Xpa	xeroderma pigmentosum, complementation group A [Source:MGI Symbol;Acc:MGI:99135]
ENSMUSG00000049670	2.90039e-09	0.187311	0.41	0.314	5.52728e-05	Morn4	MORN repeat containing 4 [Source:MGI Symbol;Acc:MGI:2449568]
ENSMUSG00000021198	4.45728e-09	0.188676	0.404	0.311	8.49424e-05	Unc79	unc-79 homolog [Source:MGI Symbol;Acc:MGI:2684729]
ENSMUSG00000026004	3.3234e-08	0.180444	0.447	0.356	0.00063334	Kansl1l	KAT8 regulatory NSL complex subunit 1-like [Source:MGI Symbol;Acc:MGI:1915941]
ENSMUSG00000042444	1.15188e-08	0.200876	0.41	0.32	0.000219514	Mindy2	MINDY lysine 48 deubiquitinase 2 [Source:MGI Symbol;Acc:MGI:2443086]
ENSMUSG00000022564	8.22852e-09	0.208516	0.413	0.325	0.000156811	Grina	glutamate receptor, ionotropic, N-methyl D-aspartate-associated protein 1 (glutamate binding) [Source:MGI Symbol;Acc:MGI:1913418]
ENSMUSG00000040859	1.39167e-07	0.175707	0.448	0.362	0.0026521	Bsdc1	BSD domain containing 1 [Source:MGI Symbol;Acc:MGI:1913466]
ENSMUSG00000062127	1.91855e-07	0.165275	0.432	0.348	0.00365617	Cttnbp2nl	CTTNBP2 N-terminal like [Source:MGI Symbol;Acc:MGI:1933137]
ENSMUSG00000020646	1.40908e-07	0.179569	0.41	0.328	0.00268528	Mboat2	membrane bound O-acyltransferase domain containing 2 [Source:MGI Symbol;Acc:MGI:1914466]
ENSMUSG00000025408	2.21629e-06	0.147033	0.477	0.395	0.0422357	Ddit3	DNA-damage inducible transcript 3 [Source:MGI Symbol;Acc:MGI:109247]
ENSMUSG00000020601	3.4802e-08	0.215812	0.407	0.327	0.000663222	Trib2	tribbles pseudokinase 2 [Source:MGI Symbol;Acc:MGI:2145021]
ENSMUSG00000015837	1.45305e-06	0.1615	0.439	0.362	0.0276907	Sqstm1	sequestosome 1 [Source:MGI Symbol;Acc:MGI:107931]
ENSMUSG00000033769	3.26495e-07	0.177531	0.463	0.386	0.00622202	Exoc6b	exocyst complex component 6B [Source:MGI Symbol;Acc:MGI:1923164]
ENSMUSG00000023572	1.20848e-06	0.154601	0.451	0.379	0.0230301	Ccndbp1	cyclin D-type binding-protein 1 [Source:MGI Symbol;Acc:MGI:109595]
ENSMUSG00000027654	5.92453e-07	0.233721	0.418	0.346	0.0112904	Fam83d	family with sequence similarity 83, member D [Source:MGI Symbol;Acc:MGI:1919128]
ENSMUSG00000029534	2.44105e-07	0.212812	0.441	0.371	0.0046519	St7	suppression of tumorigenicity 7 [Source:MGI Symbol;Acc:MGI:1927450]

## Sheet: g.Profiler_DCXHigh
g.Profiler : Functional profiling of DcxHigh
source	term_name	term_id	adjusted_p_value	negative_log10_of_adjusted_p_value	term_size	query_size	intersection_size	effective_domain_size	intersections
KEGG	GABAergic synapse	KEGG:04727	0.0385855	1.41358	87	37	4	8583	GAD1,PLCL1,SLC32A1,GNB4
REAC	Neuronal System	REAC:R-MMU-112316	0.0102369	1.98983	296	39	8	8710	GAD1,RAB3A,CACNG4,SLC32A1,CAMK1,FLOT1,GNB4,DLGAP1
REAC	GABA synthesis, release, reuptake and degradation	REAC:R-MMU-888590	0.0115074	1.93902	16	39	3	8710	GAD1,RAB3A,SLC32A1
REAC	Transmission across Chemical Synapses	REAC:R-MMU-112315	0.0352428	1.45293	181	39	6	8710	GAD1,RAB3A,CACNG4,SLC32A1,CAMK1,GNB4

## Sheet: Gene_list_DCXLow
Gene list of iNB_DCXLow cells
gene	p_val	avg_log2FC	pct.1	pct.2	p_val_adj	external_gene_name	description
ENSMUSG00000039197	7.908e-115	0.80356	0.694	0.302	1.50703e-110	Adk	adenosine kinase [Source:MGI Symbol;Acc:MGI:87930]
ENSMUSG00000058173	1.50368e-101	0.667229	0.577	0.192	2.86556e-97	Smco4	single-pass membrane protein with coiled-coil domains 4 [Source:MGI Symbol;Acc:MGI:3039636]
ENSMUSG00000020122	2.83596e-114	1.21732	0.612	0.229	5.40448e-110	Egfr	epidermal growth factor receptor [Source:MGI Symbol;Acc:MGI:95294]
ENSMUSG00000090122	2.28455e-97	0.797018	0.594	0.225	4.35367e-93	Kcne1l	potassium voltage-gated channel, Isk-related family, member 1-like, pseudogene [Source:MGI Symbol;Acc:MGI:1913490]
ENSMUSG00000031762	6.08393e-120	1.84801	0.717	0.351	1.15942e-115	Mt2	metallothionein 2 [Source:MGI Symbol;Acc:MGI:97172]
ENSMUSG00000000247	2.4029e-121	1.2125	0.76	0.395	4.57921e-117	Lhx2	LIM homeobox protein 2 [Source:MGI Symbol;Acc:MGI:96785]
ENSMUSG00000013629	2.97744e-89	0.559314	0.504	0.15	5.67412e-85	Cad	carbamoyl-phosphate synthetase 2, aspartate transcarbamylase, and dihydroorotase [Source:MGI Symbol;Acc:MGI:1916969]
ENSMUSG00000021127	1.11987e-99	1.15912	0.622	0.274	2.13414e-95	Zfp36l1	zinc finger protein 36, C3H type-like 1 [Source:MGI Symbol;Acc:MGI:107946]
ENSMUSG00000014773	1.69023e-83	0.684451	0.525	0.184	3.22107e-79	Dll1	delta like canonical Notch ligand 1 [Source:MGI Symbol;Acc:MGI:104659]
ENSMUSG00000025813	2.62119e-75	0.535438	0.588	0.247	4.99521e-71	Homer2	homer scaffolding protein 2 [Source:MGI Symbol;Acc:MGI:1347354]
ENSMUSG00000072949	7.94025e-90	0.939246	0.624	0.284	1.51317e-85	Acot1	acyl-CoA thioesterase 1 [Source:MGI Symbol;Acc:MGI:1349396]
ENSMUSG00000027165	2.61523e-72	0.508459	0.619	0.283	4.98385e-68	Iftap	intraflagellar transport associated protein [Source:MGI Symbol;Acc:MGI:1915420]
ENSMUSG00000022122	2.22682e-86	0.800433	0.459	0.124	4.24366e-82	Ednrb	endothelin receptor type B [Source:MGI Symbol;Acc:MGI:102720]
ENSMUSG00000006442	1.66817e-75	0.590747	0.624	0.291	3.17904e-71	Srm	spermidine synthase [Source:MGI Symbol;Acc:MGI:102690]
ENSMUSG00000034520	1.56336e-71	0.515512	0.515	0.19	2.9793e-67	Gjc1	gap junction protein, gamma 1 [Source:MGI Symbol;Acc:MGI:95718]
ENSMUSG00000006732	5.64365e-72	0.595347	0.531	0.21	1.07551e-67	Mettl1	methyltransferase like 1 [Source:MGI Symbol;Acc:MGI:1339986]
ENSMUSG00000039682	1.60791e-71	0.573246	0.652	0.335	3.0642e-67	Lap3	leucine aminopeptidase 3 [Source:MGI Symbol;Acc:MGI:1914238]
ENSMUSG00000051359	5.53081e-71	0.773483	0.467	0.165	1.05401e-66	Ncald	neurocalcin delta [Source:MGI Symbol;Acc:MGI:1196326]
ENSMUSG00000021048	6.58113e-65	0.47678	0.502	0.2	1.25417e-60	Mthfd1	methylenetetrahydrofolate dehydrogenase (NADP+ dependent), methenyltetrahydrofolate cyclohydrolase, formyltetrahydrofolate synthase [Source:MGI Symbol;Acc:MGI:1342005]
ENSMUSG00000002274	1.23263e-66	0.698751	0.551	0.251	2.34901e-62	Metrn	meteorin, glial cell differentiation regulator [Source:MGI Symbol;Acc:MGI:1917333]
ENSMUSG00000020811	1.91795e-73	0.530419	0.407	0.11	3.65504e-69	Wscd1	WSC domain containing 1 [Source:MGI Symbol;Acc:MGI:2448493]
ENSMUSG00000024805	1.23514e-58	0.490189	0.567	0.273	2.3538e-54	Pcgf5	polycomb group ring finger 5 [Source:MGI Symbol;Acc:MGI:1923505]
ENSMUSG00000024132	5.23902e-57	0.45156	0.636	0.348	9.98399e-53	Eci1	enoyl-Coenzyme A delta isomerase 1 [Source:MGI Symbol;Acc:MGI:94871]
ENSMUSG00000003436	1.25577e-57	0.499866	0.527	0.241	2.39311e-53	Dll3	delta like canonical Notch ligand 3 [Source:MGI Symbol;Acc:MGI:1096877]
ENSMUSG00000035021	2.17907e-46	0.443501	0.627	0.344	4.15265e-42	Baz1a	bromodomain adjacent to zinc finger domain 1A [Source:MGI Symbol;Acc:MGI:1309478]
ENSMUSG00000030605	1.86662e-72	1.64702	0.563	0.281	3.55721e-68	Mfge8	milk fat globule EGF and factor V/VIII domain containing [Source:MGI Symbol;Acc:MGI:102768]
ENSMUSG00000041120	1.33431e-57	0.506609	0.47	0.189	2.54279e-53	Nbl1	NBL1, DAN family BMP antagonist [Source:MGI Symbol;Acc:MGI:104591]
ENSMUSG00000040888	2.37542e-56	0.462479	0.666	0.386	4.52684e-52	Gfer	growth factor, augmenter of liver regeneration [Source:MGI Symbol;Acc:MGI:107757]
ENSMUSG00000046230	2.94202e-52	0.466855	0.574	0.294	5.6066e-48	Vps13a	vacuolar protein sorting 13A [Source:MGI Symbol;Acc:MGI:2444304]
ENSMUSG00000040658	5.83763e-56	0.480989	0.659	0.38	1.11248e-51	Dnph1	2'-deoxynucleoside 5'-phosphate N-hydrolase 1 [Source:MGI Symbol;Acc:MGI:3039376]
ENSMUSG00000000751	3.40466e-53	0.480318	0.644	0.366	6.48827e-49	Rpa1	replication protein A1 [Source:MGI Symbol;Acc:MGI:1915525]
ENSMUSG00000019803	1.12564e-59	0.531837	0.459	0.184	2.14513e-55	Nr2e1	nuclear receptor subfamily 2, group E, member 1 [Source:MGI Symbol;Acc:MGI:1100526]
ENSMUSG00000028194	1.34986e-59	0.749844	0.444	0.173	2.57242e-55	Ddah1	dimethylarginine dimethylaminohydrolase 1 [Source:MGI Symbol;Acc:MGI:1916469]
ENSMUSG00000059991	3.49873e-63	0.690594	0.404	0.133	6.66752e-59	Nptx2	neuronal pentraxin 2 [Source:MGI Symbol;Acc:MGI:1858209]
ENSMUSG00000020650	1.89728e-51	0.425619	0.499	0.229	3.61565e-47	Bcap29	B cell receptor associated protein 29 [Source:MGI Symbol;Acc:MGI:101917]
ENSMUSG00000056999	6.48325e-49	0.429485	0.522	0.257	1.23551e-44	Ide	insulin degrading enzyme [Source:MGI Symbol;Acc:MGI:96412]
ENSMUSG00000066637	2.7528e-47	0.418631	0.57	0.305	5.24602e-43	Ttc32	tetratricopeptide repeat domain 32 [Source:MGI Symbol;Acc:MGI:1922766]
ENSMUSG00000024177	2.57556e-44	0.38156	0.557	0.293	4.90825e-40	Nme4	NME/NM23 nucleoside diphosphate kinase 4 [Source:MGI Symbol;Acc:MGI:1931148]
ENSMUSG00000021474	6.26853e-58	0.58177	0.644	0.38	1.19459e-53	Sfxn1	sideroflexin 1 [Source:MGI Symbol;Acc:MGI:2137677]
ENSMUSG00000034321	1.06203e-46	0.409143	0.628	0.366	2.0239e-42	Exosc1	exosome component 1 [Source:MGI Symbol;Acc:MGI:1913833]
ENSMUSG00000030796	3.93062e-49	0.484687	0.653	0.396	7.49059e-45	Tead2	TEA domain family member 2 [Source:MGI Symbol;Acc:MGI:104904]
ENSMUSG00000070047	1.69081e-52	0.377626	0.407	0.15	3.22217e-48	Fat1	FAT atypical cadherin 1 [Source:MGI Symbol;Acc:MGI:109168]
ENSMUSG00000061286	1.88556e-48	0.4305	0.651	0.395	3.59331e-44	Exosc5	exosome component 5 [Source:MGI Symbol;Acc:MGI:107889]
ENSMUSG00000048007	3.55141e-51	0.444432	0.654	0.399	6.76793e-47	Timm8a1	translocase of inner mitochondrial membrane 8A1 [Source:MGI Symbol;Acc:MGI:1353433]
ENSMUSG00000062937	6.65729e-48	0.400818	0.459	0.206	1.26868e-43	Mtap	methylthioadenosine phosphorylase [Source:MGI Symbol;Acc:MGI:1914152]
ENSMUSG00000018697	3.68636e-44	0.378722	0.522	0.273	7.0251e-40	Aatf	apoptosis antagonizing transcription factor [Source:MGI Symbol;Acc:MGI:1929608]
ENSMUSG00000001666	2.66715e-44	0.427005	0.6	0.352	5.08279e-40	Ddt	D-dopachrome tautomerase [Source:MGI Symbol;Acc:MGI:1298381]
ENSMUSG00000055373	1.25783e-41	0.416108	0.476	0.228	2.39706e-37	Fut9	fucosyltransferase 9 [Source:MGI Symbol;Acc:MGI:1330859]
ENSMUSG00000024429	2.99199e-43	0.368803	0.577	0.329	5.70183e-39	Gnl1	guanine nucleotide binding protein-like 1 [Source:MGI Symbol;Acc:MGI:95764]
ENSMUSG00000026305	1.14974e-48	0.448165	0.401	0.155	2.19106e-44	Lrrfip1	leucine rich repeat (in FLII) interacting protein 1 [Source:MGI Symbol;Acc:MGI:1342770]
ENSMUSG00000024812	2.36022e-47	0.40774	0.425	0.183	4.49787e-43	Tjp2	tight junction protein 2 [Source:MGI Symbol;Acc:MGI:1341872]
ENSMUSG00000020706	2.47934e-45	0.449377	0.563	0.321	4.72487e-41	Ftsj3	FtsJ RNA methyltransferase homolog 3 (E. coli) [Source:MGI Symbol;Acc:MGI:1860295]
ENSMUSG00000040612	6.95549e-44	0.457351	0.436	0.195	1.32551e-39	Ildr2	immunoglobulin-like domain containing receptor 2 [Source:MGI Symbol;Acc:MGI:1196370]
ENSMUSG00000003813	2.45497e-42	0.409409	0.613	0.373	4.67844e-38	Rad23a	RAD23 homolog A, nucleotide excision repair protein [Source:MGI Symbol;Acc:MGI:105126]
ENSMUSG00000002459	5.21436e-44	0.529538	0.609	0.37	9.937e-40	Rgs20	regulator of G-protein signaling 20 [Source:MGI Symbol;Acc:MGI:1929866]
ENSMUSG00000030609	1.71234e-40	0.388745	0.512	0.273	3.26321e-36	Aen	apoptosis enhancing nuclease [Source:MGI Symbol;Acc:MGI:1915298]
ENSMUSG00000027984	1.57699e-44	0.408659	0.454	0.216	3.00528e-40	Hadh	hydroxyacyl-Coenzyme A dehydrogenase [Source:MGI Symbol;Acc:MGI:96009]
ENSMUSG00000024176	1.20099e-44	0.463063	0.414	0.179	2.28873e-40	Sox8	SRY (sex determining region Y)-box 8 [Source:MGI Symbol;Acc:MGI:98370]
ENSMUSG00000027254	7.06555e-39	0.379389	0.459	0.225	1.34648e-34	Map1a	microtubule-associated protein 1 A [Source:MGI Symbol;Acc:MGI:1306776]
ENSMUSG00000015305	2.33122e-42	0.383536	0.419	0.185	4.44261e-38	Sash1	SAM and SH3 domain containing 1 [Source:MGI Symbol;Acc:MGI:1917347]
ENSMUSG00000020534	8.31913e-43	0.352097	0.422	0.188	1.58538e-38	Shmt1	serine hydroxymethyltransferase 1 (soluble) [Source:MGI Symbol;Acc:MGI:98299]
ENSMUSG00000025995	5.58588e-35	0.316314	0.511	0.28	1.0645e-30	Wdr75	WD repeat domain 75 [Source:MGI Symbol;Acc:MGI:1920924]
ENSMUSG00000079056	5.13227e-38	0.349414	0.488	0.257	9.78057e-34	Kcnip3	Kv channel interacting protein 3, calsenilin [Source:MGI Symbol;Acc:MGI:1929258]
ENSMUSG00000039533	4.12304e-44	0.497695	0.418	0.188	7.85727e-40	Mmd2	monocyte to macrophage differentiation-associated 2 [Source:MGI Symbol;Acc:MGI:1922354]
ENSMUSG00000051319	3.78493e-35	0.357318	0.629	0.399	7.21295e-31	Mtln	mitoregulin [Source:MGI Symbol;Acc:MGI:1915135]
ENSMUSG00000029455	4.29048e-41	0.460612	0.45	0.221	8.17637e-37	Aldh2	aldehyde dehydrogenase 2, mitochondrial [Source:MGI Symbol;Acc:MGI:99600]
ENSMUSG00000000295	6.61934e-36	0.348231	0.511	0.283	1.26145e-31	Hddc2	HD domain containing 2 [Source:MGI Symbol;Acc:MGI:1916942]
ENSMUSG00000040659	1.2777e-38	0.497225	0.562	0.334	2.43491e-34	Efhd2	EF hand domain containing 2 [Source:MGI Symbol;Acc:MGI:106504]
ENSMUSG00000028184	9.50601e-38	0.367416	0.44	0.212	1.81156e-33	Adgrl2	adhesion G protein-coupled receptor L2 [Source:MGI Symbol;Acc:MGI:2139714]
ENSMUSG00000027423	2.79481e-38	0.404287	0.611	0.383	5.32607e-34	Snx5	sorting nexin 5 [Source:MGI Symbol;Acc:MGI:1916428]
ENSMUSG00000022476	4.41776e-37	0.371982	0.566	0.339	8.41892e-33	Polr3h	polymerase (RNA) III (DNA directed) polypeptide H [Source:MGI Symbol;Acc:MGI:1926179]
ENSMUSG00000031584	6.58224e-34	0.341305	0.514	0.288	1.25438e-29	Gsr	glutathione reductase [Source:MGI Symbol;Acc:MGI:95804]
ENSMUSG00000026558	8.90937e-36	0.325372	0.483	0.257	1.69786e-31	Uck2	uridine-cytidine kinase 2 [Source:MGI Symbol;Acc:MGI:1931744]
ENSMUSG00000029446	1.13651e-39	0.542925	0.552	0.327	2.16584e-35	Psph	phosphoserine phosphatase [Source:MGI Symbol;Acc:MGI:97788]
ENSMUSG00000024968	1.26244e-39	0.42542	0.581	0.356	2.40584e-35	Rcor2	REST corepressor 2 [Source:MGI Symbol;Acc:MGI:1859854]
ENSMUSG00000037376	7.4225e-34	0.366518	0.62	0.395	1.41451e-29	Trmt6	tRNA methyltransferase 6 [Source:MGI Symbol;Acc:MGI:1914176]
ENSMUSG00000025762	2.97286e-33	0.30474	0.463	0.241	5.66538e-29	Larp1b	La ribonucleoprotein domain family, member 1B [Source:MGI Symbol;Acc:MGI:1914604]
ENSMUSG00000037278	8.4906e-40	0.442368	0.465	0.243	1.61805e-35	Tmem97	transmembrane protein 97 [Source:MGI Symbol;Acc:MGI:1916321]
ENSMUSG00000029246	1.39866e-33	0.307879	0.487	0.265	2.66543e-29	Ppat	phosphoribosyl pyrophosphate amidotransferase [Source:MGI Symbol;Acc:MGI:2387203]
ENSMUSG00000029776	3.20229e-34	0.325365	0.502	0.28	6.1026e-30	Hibadh	3-hydroxyisobutyrate dehydrogenase [Source:MGI Symbol;Acc:MGI:1889802]
ENSMUSG00000029672	2.45273e-34	0.348976	0.539	0.318	4.67417e-30	Fam3c	FAM3 metabolism regulating signaling molecule C [Source:MGI Symbol;Acc:MGI:107892]
ENSMUSG00000067995	9.099e-31	0.291536	0.55	0.33	1.734e-26	Gtf2f2	general transcription factor IIF, polypeptide 2 [Source:MGI Symbol;Acc:MGI:1915955]
ENSMUSG00000035642	2.41848e-36	0.391319	0.597	0.377	4.6089e-32	Aamdc	adipogenesis associated Mth938 domain containing [Source:MGI Symbol;Acc:MGI:1913523]
ENSMUSG00000033222	4.74538e-32	0.288453	0.456	0.237	9.04327e-28	Ttf2	transcription termination factor, RNA polymerase II [Source:MGI Symbol;Acc:MGI:1921294]
ENSMUSG00000015839	3.33565e-36	0.379848	0.431	0.212	6.35675e-32	Nfe2l2	nuclear factor, erythroid derived 2, like 2 [Source:MGI Symbol;Acc:MGI:108420]
ENSMUSG00000002068	3.18555e-35	0.407093	0.435	0.217	6.0707e-31	Ccne1	cyclin E1 [Source:MGI Symbol;Acc:MGI:88316]
ENSMUSG00000032965	2.5085e-33	0.331978	0.519	0.303	4.78045e-29	Ift57	intraflagellar transport 57 [Source:MGI Symbol;Acc:MGI:1921166]
ENSMUSG00000042426	6.15365e-30	0.293734	0.52	0.304	1.1727e-25	Dhx29	DEAH (Asp-Glu-Ala-His) box polypeptide 29 [Source:MGI Symbol;Acc:MGI:2145374]
ENSMUSG00000020532	3.75225e-31	0.328041	0.614	0.399	7.15066e-27	Acaca	acetyl-Coenzyme A carboxylase alpha [Source:MGI Symbol;Acc:MGI:108451]
ENSMUSG00000074182	1.33259e-31	0.309161	0.601	0.386	2.53951e-27	Znhit6	zinc finger, HIT type 6 [Source:MGI Symbol;Acc:MGI:1916996]
ENSMUSG00000024312	2.16805e-31	0.282098	0.461	0.247	4.13165e-27	Wdr46	WD repeat domain 46 [Source:MGI Symbol;Acc:MGI:1931871]
ENSMUSG00000021033	6.5854e-35	0.336845	0.494	0.28	1.25498e-30	Gstz1	glutathione transferase zeta 1 (maleylacetoacetate isomerase) [Source:MGI Symbol;Acc:MGI:1341859]
ENSMUSG00000026192	2.41241e-35	0.361818	0.612	0.398	4.59733e-31	Atic	5-aminoimidazole-4-carboxamide ribonucleotide formyltransferase/IMP cyclohydrolase [Source:MGI Symbol;Acc:MGI:1351352]
ENSMUSG00000031990	5.18878e-33	0.352835	0.527	0.314	9.88825e-29	Jam3	junction adhesion molecule 3 [Source:MGI Symbol;Acc:MGI:1933825]
ENSMUSG00000057497	2.26692e-32	0.342334	0.571	0.359	4.32007e-28	Fam136a	family with sequence similarity 136, member A [Source:MGI Symbol;Acc:MGI:1913738]
ENSMUSG00000081534	3.89359e-31	0.336342	0.55	0.339	7.42002e-27	Slc48a1	solute carrier family 48 (heme transporter), member 1 [Source:MGI Symbol;Acc:MGI:1914989]
ENSMUSG00000028069	4.26164e-29	0.289421	0.47	0.259	8.1214e-25	Gpatch4	G patch domain containing 4 [Source:MGI Symbol;Acc:MGI:1913864]
ENSMUSG00000031232	2.03965e-31	0.378571	0.556	0.346	3.88697e-27	Magt1	magnesium transporter 1 [Source:MGI Symbol;Acc:MGI:1914325]
ENSMUSG00000019818	8.30254e-34	0.383304	0.577	0.367	1.58222e-29	Cd164	CD164 antigen [Source:MGI Symbol;Acc:MGI:1859568]
ENSMUSG00000025358	1.82925e-29	0.311649	0.539	0.33	3.48601e-25	Cdk2	cyclin-dependent kinase 2 [Source:MGI Symbol;Acc:MGI:104772]
ENSMUSG00000003604	3.48493e-33	0.299234	0.417	0.208	6.64122e-29	Aven	apoptosis, caspase activation inhibitor [Source:MGI Symbol;Acc:MGI:1921518]
ENSMUSG00000034165	9.76281e-32	0.320389	0.49	0.281	1.8605e-27	Ccnd3	cyclin D3 [Source:MGI Symbol;Acc:MGI:88315]
ENSMUSG00000024640	4.15226e-32	0.474194	0.537	0.329	7.91296e-28	Psat1	phosphoserine aminotransferase 1 [Source:MGI Symbol;Acc:MGI:2183441]
ENSMUSG00000053012	5.00151e-30	0.341767	0.501	0.293	9.53138e-26	Krcc1	lysine-rich coiled-coil 1 [Source:MGI Symbol;Acc:MGI:1889377]
ENSMUSG00000022913	1.51626e-30	0.301701	0.506	0.299	2.88953e-26	Psmg1	proteasome (prosome, macropain) assembly chaperone 1 [Source:MGI Symbol;Acc:MGI:1860263]
ENSMUSG00000025403	5.84037e-31	0.342373	0.463	0.256	1.113e-26	Shmt2	serine hydroxymethyltransferase 2 (mitochondrial) [Source:MGI Symbol;Acc:MGI:1277989]
ENSMUSG00000042210	2.15149e-34	0.328007	0.401	0.194	4.10009e-30	Abhd14a	abhydrolase domain containing 14A [Source:MGI Symbol;Acc:MGI:1915894]
ENSMUSG00000055760	1.85797e-29	0.285483	0.55	0.343	3.54073e-25	Gemin6	gem nuclear organelle associated protein 6 [Source:MGI Symbol;Acc:MGI:1914492]
ENSMUSG00000022722	5.51718e-27	0.265575	0.551	0.345	1.05141e-22	Arl6	ADP-ribosylation factor-like 6 [Source:MGI Symbol;Acc:MGI:1927136]
ENSMUSG00000029319	8.83116e-32	0.326279	0.553	0.347	1.68295e-27	Coq2	coenzyme Q2 4-hydroxybenzoate polyprenyltransferase [Source:MGI Symbol;Acc:MGI:1919133]
ENSMUSG00000022407	2.17553e-32	0.333558	0.489	0.283	4.14591e-28	Adsl	adenylosuccinate lyase [Source:MGI Symbol;Acc:MGI:103202]
ENSMUSG00000038736	9.61208e-30	0.308705	0.515	0.309	1.83177e-25	Nudcd1	NudC domain containing 1 [Source:MGI Symbol;Acc:MGI:1914679]
ENSMUSG00000075232	1.69362e-30	0.283088	0.435	0.229	3.22754e-26	Amd1	S-adenosylmethionine decarboxylase 1 [Source:MGI Symbol;Acc:MGI:88004]
ENSMUSG00000020116	1.08038e-30	0.297767	0.479	0.273	2.05888e-26	Pno1	partner of NOB1 homolog [Source:MGI Symbol;Acc:MGI:1913499]
ENSMUSG00000053644	4.1947e-32	0.373319	0.488	0.283	7.99384e-28	Aldh7a1	aldehyde dehydrogenase family 7, member A1 [Source:MGI Symbol;Acc:MGI:108186]
ENSMUSG00000060098	4.18767e-27	0.280087	0.57	0.365	7.98045e-23	Prmt7	protein arginine N-methyltransferase 7 [Source:MGI Symbol;Acc:MGI:2384879]
ENSMUSG00000078570	1.47075e-30	0.323922	0.588	0.383	2.80281e-26	1110065P20Rik	RIKEN cDNA 1110065P20 gene [Source:MGI Symbol;Acc:MGI:1916170]
ENSMUSG00000033577	3.85361e-26	0.320425	0.603	0.399	7.34382e-22	Myo6	myosin VI [Source:MGI Symbol;Acc:MGI:104785]
ENSMUSG00000032038	9.28392e-29	0.30478	0.5	0.298	1.76924e-24	St3gal4	ST3 beta-galactoside alpha-2,3-sialyltransferase 4 [Source:MGI Symbol;Acc:MGI:1316743]
ENSMUSG00000020814	2.20413e-31	0.352929	0.434	0.232	4.20041e-27	Mxra7	matrix-remodelling associated 7 [Source:MGI Symbol;Acc:MGI:1914872]
ENSMUSG00000005981	1.69929e-30	0.320248	0.531	0.33	3.23834e-26	Trap1	TNF receptor-associated protein 1 [Source:MGI Symbol;Acc:MGI:1915265]
ENSMUSG00000066643	4.9094e-26	0.271554	0.529	0.328	9.35584e-22	Wdr35	WD repeat domain 35 [Source:MGI Symbol;Acc:MGI:1921932]
ENSMUSG00000032350	1.21757e-28	0.271782	0.426	0.225	2.32033e-24	Gclc	glutamate-cysteine ligase, catalytic subunit [Source:MGI Symbol;Acc:MGI:104990]
ENSMUSG00000022471	2.3942e-30	0.321677	0.563	0.362	4.56263e-26	Xrcc6	X-ray repair complementing defective repair in Chinese hamster cells 6 [Source:MGI Symbol;Acc:MGI:95606]
ENSMUSG00000015944	4.85474e-27	0.307383	0.507	0.307	9.25167e-23	Castor2	cytosolic arginine sensor for mTORC1 subunit 2 [Source:MGI Symbol;Acc:MGI:1933384]
ENSMUSG00000024539	1.66757e-23	0.232496	0.528	0.328	3.1779e-19	Ptpn2	protein tyrosine phosphatase, non-receptor type 2 [Source:MGI Symbol;Acc:MGI:97806]
ENSMUSG00000035342	1.67166e-29	0.296637	0.479	0.279	3.18568e-25	Lzts2	leucine zipper, putative tumor suppressor 2 [Source:MGI Symbol;Acc:MGI:2385095]
ENSMUSG00000029036	1.24328e-29	0.311811	0.515	0.316	2.36932e-25	Atad3a	ATPase family, AAA domain containing 3A [Source:MGI Symbol;Acc:MGI:1919214]
ENSMUSG00000030264	1.76843e-25	0.261044	0.529	0.33	3.37009e-21	Thumpd3	THUMP domain containing 3 [Source:MGI Symbol;Acc:MGI:1277973]
ENSMUSG00000024222	3.04833e-26	0.261018	0.456	0.258	5.8092e-22	Fkbp5	FK506 binding protein 5 [Source:MGI Symbol;Acc:MGI:104670]
ENSMUSG00000026196	1.55095e-26	0.296755	0.51	0.312	2.95565e-22	Bard1	BRCA1 associated RING domain 1 [Source:MGI Symbol;Acc:MGI:1328361]
ENSMUSG00000046573	1.65749e-31	0.321484	0.412	0.214	3.15867e-27	Lyrm4	LYR motif containing 4 [Source:MGI Symbol;Acc:MGI:2683538]
ENSMUSG00000021496	1.24032e-27	0.31865	0.594	0.396	2.36369e-23	Pcbd2	pterin 4 alpha carbinolamine dehydratase/dimerization cofactor of hepatocyte nuclear factor 1 alpha (TCF1) 2 [Source:MGI Symbol;Acc:MGI:1919812]
ENSMUSG00000030505	1.55526e-29	0.274219	0.406	0.209	2.96386e-25	Prmt3	protein arginine N-methyltransferase 3 [Source:MGI Symbol;Acc:MGI:1919224]
ENSMUSG00000001761	6.86729e-28	0.297057	0.438	0.241	1.3087e-23	Smo	smoothened, frizzled class receptor [Source:MGI Symbol;Acc:MGI:108075]
ENSMUSG00000002308	2.80448e-28	0.302039	0.506	0.309	5.34449e-24	Cd320	CD320 antigen [Source:MGI Symbol;Acc:MGI:1860083]
ENSMUSG00000029063	2.99301e-26	0.282098	0.528	0.332	5.70378e-22	Nadk	NAD kinase [Source:MGI Symbol;Acc:MGI:2183149]
ENSMUSG00000034875	2.89037e-25	0.273096	0.567	0.371	5.50818e-21	Nudt19	nudix (nucleoside diphosphate linked moiety X)-type motif 19 [Source:MGI Symbol;Acc:MGI:94203]
ENSMUSG00000034218	3.37975e-27	0.314487	0.54	0.345	6.44079e-23	Atm	ataxia telangiectasia mutated [Source:MGI Symbol;Acc:MGI:107202]
ENSMUSG00000038759	2.95968e-25	0.275224	0.513	0.318	5.64027e-21	Nup205	nucleoporin 205 [Source:MGI Symbol;Acc:MGI:2141625]
ENSMUSG00000026603	2.34809e-29	0.301604	0.418	0.223	4.47476e-25	Smyd2	SET and MYND domain containing 2 [Source:MGI Symbol;Acc:MGI:1915889]
ENSMUSG00000032403	3.38451e-26	0.286063	0.539	0.345	6.44987e-22	2300009A05Rik	RIKEN cDNA 2300009A05 gene [Source:MGI Symbol;Acc:MGI:1916728]
ENSMUSG00000042745	4.86815e-32	0.530555	0.503	0.309	9.27722e-28	Id1	inhibitor of DNA binding 1, HLH protein [Source:MGI Symbol;Acc:MGI:96396]
ENSMUSG00000021958	1.84831e-26	0.251339	0.414	0.22	3.52232e-22	Pinx1	PIN2/TERF1 interacting, telomerase inhibitor 1 [Source:MGI Symbol;Acc:MGI:1919650]
ENSMUSG00000036990	1.09679e-23	0.263827	0.565	0.371	2.09015e-19	Otud4	OTU domain containing 4 [Source:MGI Symbol;Acc:MGI:1098801]
ENSMUSG00000025869	1.51082e-28	0.310036	0.55	0.357	2.87917e-24	Nop16	NOP16 nucleolar protein [Source:MGI Symbol;Acc:MGI:107862]
ENSMUSG00000014959	1.60868e-23	0.241316	0.543	0.351	3.06566e-19	Gorasp2	golgi reassembly stacking protein 2 [Source:MGI Symbol;Acc:MGI:2135962]
ENSMUSG00000036639	7.07955e-28	0.292998	0.523	0.331	1.34915e-23	Nudt1	nudix (nucleoside diphosphate linked moiety X)-type motif 1 [Source:MGI Symbol;Acc:MGI:109280]
ENSMUSG00000041506	1.8802e-26	0.281166	0.486	0.294	3.58309e-22	Rrp9	ribosomal RNA processing 9, U3 small nucleolar RNA binding protein [Source:MGI Symbol;Acc:MGI:2384313]
ENSMUSG00000022557	6.10131e-28	0.272604	0.418	0.226	1.16273e-23	Bop1	block of proliferation 1 [Source:MGI Symbol;Acc:MGI:1334460]
ENSMUSG00000018651	2.13974e-26	0.257416	0.452	0.261	4.0777e-22	Tada2a	transcriptional adaptor 2A [Source:MGI Symbol;Acc:MGI:2144471]
ENSMUSG00000026799	2.16235e-24	0.254568	0.514	0.323	4.1208e-20	Med27	mediator complex subunit 27 [Source:MGI Symbol;Acc:MGI:1916225]
ENSMUSG00000058392	1.97733e-26	0.27431	0.447	0.256	3.7682e-22	Rrp1b	ribosomal RNA processing 1B [Source:MGI Symbol;Acc:MGI:1919712]
ENSMUSG00000024944	9.66419e-25	0.266983	0.548	0.358	1.8417e-20	Arl2	ADP-ribosylation factor-like 2 [Source:MGI Symbol;Acc:MGI:1928393]
ENSMUSG00000041891	7.81323e-27	0.319741	0.548	0.358	1.48897e-22	Lman1	lectin, mannose-binding, 1 [Source:MGI Symbol;Acc:MGI:1917611]
ENSMUSG00000063229	2.91137e-30	0.445343	0.557	0.367	5.54819e-26	Ldha	lactate dehydrogenase A [Source:MGI Symbol;Acc:MGI:96759]
ENSMUSG00000040466	4.94829e-28	0.301192	0.403	0.213	9.42995e-24	Blvrb	biliverdin reductase B (flavin reductase (NADPH)) [Source:MGI Symbol;Acc:MGI:2385271]
ENSMUSG00000002043	5.77713e-28	0.291159	0.426	0.236	1.10095e-23	Trappc6a	trafficking protein particle complex 6A [Source:MGI Symbol;Acc:MGI:1914341]
ENSMUSG00000047649	9.98724e-25	0.286589	0.478	0.288	1.90327e-20	Cd3eap	CD3E antigen, epsilon polypeptide associated protein [Source:MGI Symbol;Acc:MGI:1917583]
ENSMUSG00000024165	1.50512e-26	0.29567	0.506	0.317	2.8683e-22	Jpt2	Jupiter microtubule associated homolog 2 [Source:MGI Symbol;Acc:MGI:1196260]
ENSMUSG00000039195	1.57294e-23	0.250415	0.495	0.306	2.99754e-19	Bbln	bublin coiled coil protein [Source:MGI Symbol;Acc:MGI:1920987]
ENSMUSG00000021692	4.64549e-26	0.281319	0.572	0.383	8.85291e-22	Dimt1	DIM1 dimethyladenosine transferase 1-like (S. cerevisiae) [Source:MGI Symbol;Acc:MGI:1913504]
ENSMUSG00000026082	2.65417e-22	0.255085	0.556	0.368	5.05806e-18	Rev1	REV1, DNA directed polymerase [Source:MGI Symbol;Acc:MGI:1929074]
ENSMUSG00000001576	1.86769e-26	0.280337	0.504	0.316	3.55926e-22	Ergic1	endoplasmic reticulum-golgi intermediate compartment (ERGIC) 1 [Source:MGI Symbol;Acc:MGI:1914708]
ENSMUSG00000004127	4.59413e-24	0.27777	0.524	0.336	8.75502e-20	Trmt10a	tRNA methyltransferase 10A [Source:MGI Symbol;Acc:MGI:1920421]
ENSMUSG00000023973	1.83019e-25	0.266023	0.473	0.285	3.4878e-21	Cnpy3	canopy FGF signaling regulator 3 [Source:MGI Symbol;Acc:MGI:1919279]
ENSMUSG00000024302	1.07836e-32	0.731323	0.471	0.283	2.05504e-28	Dtna	dystrobrevin alpha [Source:MGI Symbol;Acc:MGI:106039]
ENSMUSG00000002221	2.75644e-21	0.236076	0.561	0.374	5.25295e-17	Paxip1	PAX interacting (with transcription-activation domain) protein 1 [Source:MGI Symbol;Acc:MGI:1890430]
ENSMUSG00000053604	5.21372e-23	0.251358	0.532	0.345	9.93579e-19	Rpia	ribose 5-phosphate isomerase A [Source:MGI Symbol;Acc:MGI:103254]
ENSMUSG00000016528	6.31943e-27	0.313246	0.519	0.332	1.20429e-22	Mapkapk2	MAP kinase-activated protein kinase 2 [Source:MGI Symbol;Acc:MGI:109298]
ENSMUSG00000022972	1.53763e-26	0.301972	0.499	0.312	2.93026e-22	Cfap298	cilia and flagella associate protien 298 [Source:MGI Symbol;Acc:MGI:1915251]
ENSMUSG00000024145	8.44956e-24	0.254627	0.523	0.336	1.61023e-19	Pigf	phosphatidylinositol glycan anchor biosynthesis, class F [Source:MGI Symbol;Acc:MGI:99462]
ENSMUSG00000014075	2.50732e-25	0.266095	0.441	0.255	4.7782e-21	Dynlt2b	dynein light chain Tctex-type 2B [Source:MGI Symbol;Acc:MGI:1913311]
ENSMUSG00000014859	1.27095e-23	0.22293	0.445	0.259	2.42206e-19	E2f4	E2F transcription factor 4 [Source:MGI Symbol;Acc:MGI:103012]
ENSMUSG00000038552	3.69439e-24	0.274777	0.475	0.289	7.04039e-20	Fndc4	fibronectin type III domain containing 4 [Source:MGI Symbol;Acc:MGI:1917195]
ENSMUSG00000079283	1.36957e-23	0.258789	0.528	0.342	2.60999e-19	2310009B15Rik	RIKEN cDNA 2310009B15 gene [Source:MGI Symbol;Acc:MGI:1916799]
ENSMUSG00000031371	2.51707e-23	0.260017	0.572	0.386	4.79678e-19	Haus7	HAUS augmin-like complex, subunit 7 [Source:MGI Symbol;Acc:MGI:1920988]
ENSMUSG00000025133	1.57699e-23	0.25149	0.496	0.312	3.00527e-19	Ints4	integrator complex subunit 4 [Source:MGI Symbol;Acc:MGI:1917164]
ENSMUSG00000025607	4.86024e-21	0.2246	0.506	0.322	9.26216e-17	Copg2	coatomer protein complex, subunit gamma 2 [Source:MGI Symbol;Acc:MGI:1858683]
ENSMUSG00000001039	3.03352e-23	0.24471	0.487	0.305	5.78099e-19	B9d1	B9 protein domain 1 [Source:MGI Symbol;Acc:MGI:1351471]
ENSMUSG00000019297	5.39853e-24	0.258811	0.517	0.335	1.0288e-19	Nop9	NOP9 nucleolar protein [Source:MGI Symbol;Acc:MGI:1915092]
ENSMUSG00000030127	6.61863e-25	0.282162	0.572	0.39	1.26131e-20	Cops7a	COP9 signalosome subunit 7A [Source:MGI Symbol;Acc:MGI:1349400]
ENSMUSG00000009563	1.61277e-23	0.257832	0.49	0.309	3.07345e-19	Tor2a	torsin family 2, member A [Source:MGI Symbol;Acc:MGI:1353596]
ENSMUSG00000052139	1.49757e-21	0.251858	0.567	0.386	2.85391e-17	Babam2	BRISC and BRCA1 A complex member 2 [Source:MGI Symbol;Acc:MGI:1333875]
ENSMUSG00000029415	6.97005e-21	0.23051	0.466	0.288	1.32828e-16	Sdad1	SDA1 domain containing 1 [Source:MGI Symbol;Acc:MGI:2140779]
ENSMUSG00000032553	1.10341e-23	0.251474	0.419	0.241	2.10277e-19	Srprb	signal recognition particle receptor, B subunit [Source:MGI Symbol;Acc:MGI:102964]
ENSMUSG00000041920	1.16359e-21	0.249628	0.449	0.271	2.21746e-17	Slc16a6	solute carrier family 16 (monocarboxylic acid transporters), member 6 [Source:MGI Symbol;Acc:MGI:2144585]
ENSMUSG00000024982	1.19982e-22	0.258159	0.523	0.346	2.2865e-18	Zdhhc6	zinc finger, DHHC domain containing 6 [Source:MGI Symbol;Acc:MGI:1914230]
ENSMUSG00000020899	2.66457e-23	0.240926	0.414	0.237	5.07787e-19	Pfas	phosphoribosylformylglycinamidine synthase (FGAR amidotransferase) [Source:MGI Symbol;Acc:MGI:2684864]
ENSMUSG00000022306	9.48938e-23	0.262645	0.419	0.242	1.80839e-18	Zfpm2	zinc finger protein, multitype 2 [Source:MGI Symbol;Acc:MGI:1334444]
ENSMUSG00000024644	1.41701e-20	0.233104	0.502	0.325	2.70041e-16	Cndp2	CNDP dipeptidase 2 (metallopeptidase M20 family) [Source:MGI Symbol;Acc:MGI:1913304]
ENSMUSG00000019863	3.59102e-23	0.239385	0.407	0.23	6.8434e-19	Qrsl1	glutaminyl-tRNA synthase (glutamine-hydrolyzing)-like 1 [Source:MGI Symbol;Acc:MGI:1923813]
ENSMUSG00000026917	2.98271e-20	0.214695	0.503	0.327	5.68416e-16	Wdr5	WD repeat domain 5 [Source:MGI Symbol;Acc:MGI:2155884]
ENSMUSG00000030243	4.90816e-22	0.2291	0.426	0.25	9.35348e-18	Recql	RecQ protein-like [Source:MGI Symbol;Acc:MGI:103021]
ENSMUSG00000030714	2.62927e-21	0.241159	0.501	0.325	5.01061e-17	Sgf29	SAGA complex associated factor 29 [Source:MGI Symbol;Acc:MGI:1922815]
ENSMUSG00000023951	6.71279e-24	0.39238	0.401	0.226	1.27926e-19	Vegfa	vascular endothelial growth factor A [Source:MGI Symbol;Acc:MGI:103178]
ENSMUSG00000057572	1.15715e-19	0.223981	0.567	0.392	2.20518e-15	Zbtb8os	zinc finger and BTB domain containing 8 opposite strand [Source:MGI Symbol;Acc:MGI:1914356]
ENSMUSG00000026974	3.42e-19	0.233173	0.546	0.372	6.51749e-15	Zmynd19	zinc finger, MYND domain containing 19 [Source:MGI Symbol;Acc:MGI:1914437]
ENSMUSG00000026035	2.301e-21	0.232659	0.513	0.339	4.38502e-17	Ppil3	peptidylprolyl isomerase (cyclophilin)-like 3 [Source:MGI Symbol;Acc:MGI:1917475]
ENSMUSG00000047454	6.68027e-21	0.245241	0.487	0.314	1.27306e-16	Gphn	gephyrin [Source:MGI Symbol;Acc:MGI:109602]
ENSMUSG00000030619	6.10943e-20	0.243452	0.552	0.38	1.16427e-15	Eed	embryonic ectoderm development [Source:MGI Symbol;Acc:MGI:95286]
ENSMUSG00000019982	5.57502e-21	0.236242	0.405	0.234	1.06243e-16	Myb	myeloblastosis oncogene [Source:MGI Symbol;Acc:MGI:97249]
ENSMUSG00000008604	1.51035e-21	0.228721	0.409	0.238	2.87827e-17	Ubqln4	ubiquilin 4 [Source:MGI Symbol;Acc:MGI:2150152]
ENSMUSG00000024556	2.46396e-21	0.220767	0.403	0.233	4.69557e-17	Me2	malic enzyme 2, NAD(+)-dependent, mitochondrial [Source:MGI Symbol;Acc:MGI:2147351]
ENSMUSG00000017499	4.05679e-21	0.296662	0.419	0.249	7.73102e-17	Cdc6	cell division cycle 6 [Source:MGI Symbol;Acc:MGI:1345150]
ENSMUSG00000020415	6.00173e-21	0.239486	0.42	0.25	1.14375e-16	Pttg1	pituitary tumor-transforming gene 1 [Source:MGI Symbol;Acc:MGI:1353578]
ENSMUSG00000022983	1.34363e-20	0.233287	0.473	0.303	2.56055e-16	Scaf4	SR-related CTD-associated factor 4 [Source:MGI Symbol;Acc:MGI:2146350]
ENSMUSG00000027378	1.87079e-21	0.229726	0.409	0.24	3.56516e-17	Nphp1	nephronophthisis 1 (juvenile) homolog (human) [Source:MGI Symbol;Acc:MGI:1858233]
ENSMUSG00000001829	6.09072e-21	0.258689	0.516	0.348	1.16071e-16	Clpb	ClpB caseinolytic peptidase B [Source:MGI Symbol;Acc:MGI:1100517]
ENSMUSG00000020307	1.20755e-19	0.23441	0.562	0.394	2.30123e-15	Cdc34	cell division cycle 34 [Source:MGI Symbol;Acc:MGI:102657]
ENSMUSG00000021392	8.62138e-20	0.269269	0.522	0.354	1.64298e-15	Nol8	nucleolar protein 8 [Source:MGI Symbol;Acc:MGI:1918180]
ENSMUSG00000029821	2.71807e-18	0.213176	0.56	0.392	5.17983e-14	Gsdme	gasdermin E [Source:MGI Symbol;Acc:MGI:1889850]
ENSMUSG00000054237	8.973e-19	0.229779	0.527	0.359	1.70998e-14	Fra10ac1	FRA10AC1 homolog (human) [Source:MGI Symbol;Acc:MGI:1917817]
ENSMUSG00000028407	1.89037e-19	0.20959	0.435	0.267	3.60248e-15	Smim27	small integral membrane protein 27 [Source:MGI Symbol;Acc:MGI:1913684]
ENSMUSG00000042249	3.52281e-24	0.436218	0.492	0.324	6.71342e-20	Grk3	G protein-coupled receptor kinase 3 [Source:MGI Symbol;Acc:MGI:87941]
ENSMUSG00000018398	3.33045e-22	0.295917	0.467	0.3	6.34684e-18	Septin8	septin 8 [Source:MGI Symbol;Acc:MGI:894310]
ENSMUSG00000060121	4.31641e-21	0.233219	0.402	0.235	8.22578e-17	Gemin2	gem nuclear organelle associated protein 2 [Source:MGI Symbol;Acc:MGI:1913853]
ENSMUSG00000075229	7.58206e-18	0.201556	0.529	0.362	1.44491e-13	Ccdc58	coiled-coil domain containing 58 [Source:MGI Symbol;Acc:MGI:2146423]
ENSMUSG00000011257	1.74001e-21	0.251037	0.415	0.248	3.31593e-17	Pabpc4	poly(A) binding protein, cytoplasmic 4 [Source:MGI Symbol;Acc:MGI:2385206]
ENSMUSG00000025894	3.776e-19	0.227689	0.562	0.396	7.19592e-15	Aasdhppt	aminoadipate-semialdehyde dehydrogenase-phosphopantetheinyl transferase [Source:MGI Symbol;Acc:MGI:1914868]
ENSMUSG00000026740	3.15706e-18	0.249785	0.561	0.395	6.0164e-14	Dnajc1	DnaJ heat shock protein family (Hsp40) member C1 [Source:MGI Symbol;Acc:MGI:103268]
ENSMUSG00000022329	1.15175e-20	0.225484	0.416	0.25	2.19489e-16	Stk3	serine/threonine kinase 3 [Source:MGI Symbol;Acc:MGI:1928487]
ENSMUSG00000038489	6.08796e-18	0.20847	0.525	0.36	1.16018e-13	Polr2l	polymerase (RNA) II (DNA directed) polypeptide L [Source:MGI Symbol;Acc:MGI:1913741]
ENSMUSG00000036825	5.84476e-18	0.240925	0.541	0.377	1.11384e-13	Ssx2ip	synovial sarcoma, X 2 interacting protein [Source:MGI Symbol;Acc:MGI:2139150]
ENSMUSG00000041974	1.1255e-19	0.238462	0.438	0.274	2.14486e-15	Spidr	scaffolding protein involved in DNA repair [Source:MGI Symbol;Acc:MGI:1924834]
ENSMUSG00000078521	1.14942e-15	0.193647	0.515	0.352	2.19045e-11	Aunip	aurora kinase A and ninein interacting protein [Source:MGI Symbol;Acc:MGI:1917135]
ENSMUSG00000024245	7.1726e-20	0.24292	0.412	0.249	1.36688e-15	Tmem178	transmembrane protein 178 [Source:MGI Symbol;Acc:MGI:1915277]
ENSMUSG00000069135	1.88697e-19	0.205494	0.409	0.246	3.59601e-15	Cep43	centrosomal protein 43 [Source:MGI Symbol;Acc:MGI:1922546]
ENSMUSG00000058006	4.13083e-21	0.272975	0.403	0.241	7.87212e-17	Mdn1	midasin AAA ATPase 1 [Source:MGI Symbol;Acc:MGI:1926159]
ENSMUSG00000078652	2.38963e-17	0.206614	0.542	0.38	4.55391e-13	Psme3	proteaseome (prosome, macropain) activator subunit 3 (PA28 gamma, Ki) [Source:MGI Symbol;Acc:MGI:1096366]
ENSMUSG00000041491	1.73238e-18	0.208984	0.432	0.27	3.3014e-14	Cep78	centrosomal protein 78 [Source:MGI Symbol;Acc:MGI:1924386]
ENSMUSG00000025935	1.11309e-16	0.215976	0.55	0.389	2.12121e-12	Tram1	translocating chain-associating membrane protein 1 [Source:MGI Symbol;Acc:MGI:1919515]
ENSMUSG00000032307	1.09288e-16	0.208782	0.542	0.381	2.08269e-12	Ube2q2	ubiquitin-conjugating enzyme E2Q family member 2 [Source:MGI Symbol;Acc:MGI:2388672]
ENSMUSG00000042389	9.73625e-18	0.216004	0.508	0.347	1.85544e-13	Tsen2	tRNA splicing endonuclease subunit 2 [Source:MGI Symbol;Acc:MGI:2141599]
ENSMUSG00000001305	3.99787e-19	0.223229	0.449	0.289	7.61874e-15	Rrp15	ribosomal RNA processing 15 homolog [Source:MGI Symbol;Acc:MGI:1914473]
ENSMUSG00000001424	1.88473e-17	0.202623	0.452	0.292	3.59173e-13	Snd1	staphylococcal nuclease and tudor domain containing 1 [Source:MGI Symbol;Acc:MGI:1929266]
ENSMUSG00000022210	1.03959e-14	0.177059	0.541	0.381	1.98114e-10	Dhrs4	dehydrogenase/reductase (SDR family) member 4 [Source:MGI Symbol;Acc:MGI:90169]
ENSMUSG00000051235	2.38141e-14	0.186918	0.552	0.392	4.53826e-10	Gen1	GEN1, Holliday junction 5' flap endonuclease [Source:MGI Symbol;Acc:MGI:2443149]
ENSMUSG00000005299	3.53587e-18	0.214608	0.432	0.272	6.7383e-14	Letm1	leucine zipper-EF-hand containing transmembrane protein 1 [Source:MGI Symbol;Acc:MGI:1932557]
ENSMUSG00000019814	3.33678e-18	0.200608	0.41	0.25	6.3589e-14	Ltv1	LTV1 ribosome biogenesis factor [Source:MGI Symbol;Acc:MGI:2447810]
ENSMUSG00000021193	1.57226e-16	0.186253	0.489	0.329	2.99626e-12	Pitrm1	pitrilysin metallepetidase 1 [Source:MGI Symbol;Acc:MGI:1916867]
ENSMUSG00000056919	6.83534e-16	0.201644	0.478	0.318	1.30261e-11	Cep162	centrosomal protein 162 [Source:MGI Symbol;Acc:MGI:1925343]
ENSMUSG00000020974	7.75768e-19	0.231113	0.43	0.271	1.47838e-14	Pole2	polymerase (DNA directed), epsilon 2 (p59 subunit) [Source:MGI Symbol;Acc:MGI:1197514]
ENSMUSG00000003545	2.25982e-22	0.692889	0.405	0.247	4.30654e-18	Fosb	FBJ osteosarcoma oncogene B [Source:MGI Symbol;Acc:MGI:95575]
ENSMUSG00000025766	4.48304e-18	0.239686	0.454	0.296	8.54334e-14	D3Ertd751e	DNA segment, Chr 3, ERATO Doi 751, expressed [Source:MGI Symbol;Acc:MGI:1289213]
ENSMUSG00000034343	1.39535e-14	0.177751	0.527	0.369	2.65913e-10	Ube2f	ubiquitin-conjugating enzyme E2F (putative) [Source:MGI Symbol;Acc:MGI:1915171]
ENSMUSG00000034023	8.65936e-18	0.20073	0.416	0.258	1.65022e-13	Fancd2	Fanconi anemia, complementation group D2 [Source:MGI Symbol;Acc:MGI:2448480]
ENSMUSG00000006585	5.6747e-15	0.240122	0.534	0.377	1.08143e-10	Cdt1	chromatin licensing and DNA replication factor 1 [Source:MGI Symbol;Acc:MGI:1914427]
ENSMUSG00000024997	3.13334e-18	0.211458	0.452	0.295	5.97121e-14	Prdx3	peroxiredoxin 3 [Source:MGI Symbol;Acc:MGI:88034]
ENSMUSG00000030302	3.04567e-19	0.264606	0.448	0.291	5.80413e-15	Atp2b2	ATPase, Ca++ transporting, plasma membrane 2 [Source:MGI Symbol;Acc:MGI:105368]
ENSMUSG00000040749	7.3504e-17	0.209202	0.537	0.38	1.40076e-12	Siah1b	siah E3 ubiquitin protein ligase 1B [Source:MGI Symbol;Acc:MGI:108063]
ENSMUSG00000023272	5.56172e-18	0.202928	0.407	0.25	1.0599e-13	Creld2	cysteine-rich with EGF-like domains 2 [Source:MGI Symbol;Acc:MGI:1923987]
ENSMUSG00000001280	9.53392e-16	0.207256	0.531	0.375	1.81688e-11	Sp1	trans-acting transcription factor 1 [Source:MGI Symbol;Acc:MGI:98372]
ENSMUSG00000031928	1.97505e-17	0.213494	0.442	0.286	3.76385e-13	Mre11a	MRE11A homolog A, double strand break repair nuclease [Source:MGI Symbol;Acc:MGI:1100512]
ENSMUSG00000042590	3.85277e-16	0.2185	0.513	0.357	7.34222e-12	Ipo11	importin 11 [Source:MGI Symbol;Acc:MGI:2442377]
ENSMUSG00000018983	3.63634e-15	0.197663	0.498	0.342	6.92977e-11	E2f2	E2F transcription factor 2 [Source:MGI Symbol;Acc:MGI:1096341]
ENSMUSG00000020841	1.19961e-18	0.264708	0.482	0.326	2.2861e-14	Cpd	carboxypeptidase D [Source:MGI Symbol;Acc:MGI:107265]
ENSMUSG00000022751	8.53129e-19	0.214673	0.423	0.267	1.62581e-14	Nit2	nitrilase family, member 2 [Source:MGI Symbol;Acc:MGI:1261838]
ENSMUSG00000025264	2.1079e-16	0.200388	0.485	0.329	4.01703e-12	Tsr2	TSR2 20S rRNA accumulation [Source:MGI Symbol;Acc:MGI:1916749]
ENSMUSG00000027332	7.1651e-20	0.25561	0.426	0.27	1.36545e-15	Ivd	isovaleryl coenzyme A dehydrogenase [Source:MGI Symbol;Acc:MGI:1929242]
ENSMUSG00000035575	1.65543e-16	0.191912	0.487	0.331	3.15476e-12	Utp6	UTP6 small subunit processome component [Source:MGI Symbol;Acc:MGI:2445193]
ENSMUSG00000036885	1.51564e-17	0.250137	0.467	0.312	2.88835e-13	Arhgef26	Rho guanine nucleotide exchange factor (GEF) 26 [Source:MGI Symbol;Acc:MGI:1918053]
ENSMUSG00000040351	6.72227e-15	0.171638	0.452	0.297	1.28106e-10	Ankib1	ankyrin repeat and IBR domain containing 1 [Source:MGI Symbol;Acc:MGI:1918047]
ENSMUSG00000033294	1.08242e-17	0.197024	0.416	0.261	2.06278e-13	Noc4l	NOC4 like [Source:MGI Symbol;Acc:MGI:2140843]
ENSMUSG00000022568	6.68168e-17	0.205502	0.504	0.35	1.27333e-12	Scrib	scribbled planar cell polarity [Source:MGI Symbol;Acc:MGI:2145950]
ENSMUSG00000036167	1.71199e-14	0.187594	0.543	0.389	3.26254e-10	Pphln1	periphilin 1 [Source:MGI Symbol;Acc:MGI:1917029]
ENSMUSG00000026383	1.44373e-15	0.198638	0.545	0.392	2.75132e-11	Epb41l5	erythrocyte membrane protein band 4.1 like 5 [Source:MGI Symbol;Acc:MGI:103006]
ENSMUSG00000034108	6.59482e-18	0.218411	0.402	0.249	1.25678e-13	Ccs	copper chaperone for superoxide dismutase [Source:MGI Symbol;Acc:MGI:1333783]
ENSMUSG00000034022	5.10897e-17	0.189661	0.412	0.259	9.73616e-13	Cpsf1	cleavage and polyadenylation specific factor 1 [Source:MGI Symbol;Acc:MGI:2679722]
ENSMUSG00000027883	1.04192e-14	0.205635	0.511	0.359	1.98559e-10	Gpsm2	G-protein signalling modulator 2 (AGS3-like, C. elegans) [Source:MGI Symbol;Acc:MGI:1923373]
ENSMUSG00000031533	2.16994e-16	0.215801	0.538	0.386	4.13525e-12	Mrps31	mitochondrial ribosomal protein S31 [Source:MGI Symbol;Acc:MGI:1913153]
ENSMUSG00000051185	9.58696e-18	0.21331	0.416	0.264	1.82699e-13	Fam174a	family with sequence similarity 174, member A [Source:MGI Symbol;Acc:MGI:1914948]
ENSMUSG00000027006	1.18788e-15	0.205424	0.505	0.354	2.26374e-11	Dnajc10	DnaJ heat shock protein family (Hsp40) member C10 [Source:MGI Symbol;Acc:MGI:1914111]
ENSMUSG00000027552	5.42277e-18	0.248694	0.437	0.286	1.03342e-13	E2f5	E2F transcription factor 5 [Source:MGI Symbol;Acc:MGI:105091]
ENSMUSG00000039959	2.64316e-19	0.280551	0.522	0.371	5.03707e-15	Hip1	huntingtin interacting protein 1 [Source:MGI Symbol;Acc:MGI:1099804]
ENSMUSG00000057561	1.5642e-15	0.207473	0.514	0.363	2.9809e-11	Eif1a	eukaryotic translation initiation factor 1A [Source:MGI Symbol;Acc:MGI:95298]
ENSMUSG00000030323	8.56879e-17	0.214256	0.416	0.265	1.63295e-12	Ift122	intraflagellar transport 122 [Source:MGI Symbol;Acc:MGI:1932386]
ENSMUSG00000063320	1.54773e-16	0.200362	0.432	0.281	2.94952e-12	1190007I07Rik	RIKEN cDNA 1190007I07 gene [Source:MGI Symbol;Acc:MGI:3698433]
ENSMUSG00000086587	1.24233e-16	0.242937	0.492	0.341	2.36751e-12	Gm11837	predicted gene 11837 [Source:MGI Symbol;Acc:MGI:3702175]
ENSMUSG00000030056	9.72965e-17	0.220238	0.531	0.381	1.85418e-12	Isy1	ISY1 splicing factor homolog [Source:MGI Symbol;Acc:MGI:1923310]
ENSMUSG00000052406	1.45607e-15	0.192917	0.473	0.323	2.77482e-11	Rexo4	REX4, 3'-5' exonuclease [Source:MGI Symbol;Acc:MGI:2684957]
ENSMUSG00000028158	1.86586e-16	0.240979	0.44	0.291	3.55576e-12	Mttp	microsomal triglyceride transfer protein [Source:MGI Symbol;Acc:MGI:106926]
ENSMUSG00000040006	2.24588e-15	0.218978	0.541	0.392	4.27997e-11	Ginm1	glycoprotein integral membrane 1 [Source:MGI Symbol;Acc:MGI:2384905]
ENSMUSG00000030695	2.93951e-16	0.264036	0.408	0.259	5.60183e-12	Aldoa	aldolase A, fructose-bisphosphate [Source:MGI Symbol;Acc:MGI:87994]
ENSMUSG00000030986	6.54346e-17	0.224303	0.482	0.333	1.24699e-12	Dhx32	DEAH (Asp-Glu-Ala-His) box polypeptide 32 [Source:MGI Symbol;Acc:MGI:2141813]
ENSMUSG00000032185	1.10113e-15	0.194622	0.475	0.326	2.09842e-11	Carm1	coactivator-associated arginine methyltransferase 1 [Source:MGI Symbol;Acc:MGI:1913208]
ENSMUSG00000024052	6.51077e-16	0.227806	0.529	0.381	1.24076e-11	Lpin2	lipin 2 [Source:MGI Symbol;Acc:MGI:1891341]
ENSMUSG00000022864	2.45564e-15	0.195589	0.444	0.297	4.67972e-11	D16Ertd472e	DNA segment, Chr 16, ERATO Doi 472, expressed [Source:MGI Symbol;Acc:MGI:1196400]
ENSMUSG00000025812	1.99942e-13	0.176494	0.521	0.374	3.81029e-09	Pard3	par-3 family cell polarity regulator [Source:MGI Symbol;Acc:MGI:2135608]
ENSMUSG00000029599	4.77942e-14	0.192959	0.524	0.377	9.10814e-10	Ddx54	DEAD box helicase 54 [Source:MGI Symbol;Acc:MGI:1919240]
ENSMUSG00000071078	6.80753e-15	0.18529	0.444	0.297	1.29731e-10	Nr2c2ap	nuclear receptor 2C2-associated protein [Source:MGI Symbol;Acc:MGI:1922942]
ENSMUSG00000023883	3.26392e-14	0.183248	0.486	0.339	6.22006e-10	Phf10	PHD finger protein 10 [Source:MGI Symbol;Acc:MGI:1919307]
ENSMUSG00000020430	2.24766e-14	0.189441	0.522	0.376	4.28337e-10	Pes1	pescadillo ribosomal biogenesis factor 1 [Source:MGI Symbol;Acc:MGI:1890613]
ENSMUSG00000024436	1.37873e-16	0.217557	0.458	0.312	2.62744e-12	Mrps18b	mitochondrial ribosomal protein S18B [Source:MGI Symbol;Acc:MGI:1914223]
ENSMUSG00000034187	1.6109e-14	0.178284	0.434	0.288	3.06989e-10	Nsf	N-ethylmaleimide sensitive fusion protein [Source:MGI Symbol;Acc:MGI:104560]
ENSMUSG00000039795	9.81297e-15	0.178969	0.446	0.3	1.87006e-10	Zfand1	zinc finger, AN1-type domain 1 [Source:MGI Symbol;Acc:MGI:1913611]
ENSMUSG00000041747	1.03108e-13	0.161169	0.434	0.288	1.96493e-09	Utp15	UTP15 small subunit processome component [Source:MGI Symbol;Acc:MGI:2145443]
ENSMUSG00000071253	1.48721e-15	0.216255	0.461	0.315	2.83417e-11	Slc25a16	solute carrier family 25 (mitochondrial carrier, Graves disease autoantigen), member 16 [Source:MGI Symbol;Acc:MGI:1920382]
ENSMUSG00000004100	1.95576e-13	0.184417	0.485	0.339	3.72709e-09	Ppan	peter pan homolog [Source:MGI Symbol;Acc:MGI:2178445]
ENSMUSG00000005370	1.87375e-15	0.216319	0.481	0.335	3.57081e-11	Msh6	mutS homolog 6 [Source:MGI Symbol;Acc:MGI:1343961]
ENSMUSG00000037089	2.74776e-17	0.221282	0.417	0.271	5.23641e-13	Slc35b2	solute carrier family 35, member B2 [Source:MGI Symbol;Acc:MGI:1921086]
ENSMUSG00000015748	2.06967e-14	0.194582	0.518	0.373	3.94417e-10	Prpf3	pre-mRNA processing factor 3 [Source:MGI Symbol;Acc:MGI:1918017]
ENSMUSG00000033054	1.29073e-14	0.205799	0.492	0.347	2.45975e-10	Npat	nuclear protein in the AT region [Source:MGI Symbol;Acc:MGI:107605]
ENSMUSG00000036875	8.01329e-17	0.239544	0.463	0.318	1.52709e-12	Dna2	DNA replication helicase/nuclease 2 [Source:MGI Symbol;Acc:MGI:2443732]
ENSMUSG00000039275	6.00022e-16	0.216391	0.511	0.366	1.14346e-11	Foxk2	forkhead box K2 [Source:MGI Symbol;Acc:MGI:1916087]
ENSMUSG00000041729	8.71619e-15	0.200273	0.529	0.384	1.66104e-10	Coro2b	coronin, actin binding protein, 2B [Source:MGI Symbol;Acc:MGI:2444283]
ENSMUSG00000062619	6.54915e-14	0.187538	0.508	0.363	1.24807e-09	2310039H08Rik	RIKEN cDNA 2310039H08 gene [Source:MGI Symbol;Acc:MGI:1914351]
ENSMUSG00000028937	1.52349e-13	0.184278	0.537	0.393	2.90332e-09	Acot7	acyl-CoA thioesterase 7 [Source:MGI Symbol;Acc:MGI:1917275]
ENSMUSG00000017861	6.77094e-15	0.20686	0.479	0.335	1.29034e-10	Mybl2	myeloblastosis oncogene-like 2 [Source:MGI Symbol;Acc:MGI:101785]
ENSMUSG00000024683	8.36405e-14	0.180786	0.473	0.329	1.59394e-09	Mrpl16	mitochondrial ribosomal protein L16 [Source:MGI Symbol;Acc:MGI:2137219]
ENSMUSG00000054408	8.60823e-15	0.185624	0.412	0.268	1.64047e-10	Spcs3	signal peptidase complex subunit 3 homolog (S. cerevisiae) [Source:MGI Symbol;Acc:MGI:1923937]
ENSMUSG00000022867	2.01971e-16	0.238836	0.457	0.314	3.84895e-12	Usp25	ubiquitin specific peptidase 25 [Source:MGI Symbol;Acc:MGI:1353655]
ENSMUSG00000029610	1.16063e-16	0.227761	0.542	0.399	2.21182e-12	Aimp2	aminoacyl tRNA synthetase complex-interacting multifunctional protein 2 [Source:MGI Symbol;Acc:MGI:2385237]
ENSMUSG00000032400	3.41009e-16	0.237377	0.5	0.357	6.49862e-12	Zwilch	zwilch kinetochore protein [Source:MGI Symbol;Acc:MGI:1915264]
ENSMUSG00000073987	1.83129e-13	0.179028	0.468	0.325	3.48989e-09	Ggh	gamma-glutamyl hydrolase [Source:MGI Symbol;Acc:MGI:1329035]
ENSMUSG00000022248	2.76357e-14	0.168519	0.426	0.284	5.26654e-10	Rad1	RAD1 checkpoint DNA exonuclease [Source:MGI Symbol;Acc:MGI:1316678]
ENSMUSG00000025265	3.34233e-15	0.200884	0.457	0.315	6.36949e-11	Fgd1	FYVE, RhoGEF and PH domain containing 1 [Source:MGI Symbol;Acc:MGI:104566]
ENSMUSG00000028882	1.30959e-14	0.193793	0.519	0.377	2.49568e-10	Ppp1r8	protein phosphatase 1, regulatory subunit 8 [Source:MGI Symbol;Acc:MGI:2140494]
ENSMUSG00000029500	5.98166e-14	0.168921	0.453	0.311	1.13993e-09	Pgam5	phosphoglycerate mutase family member 5 [Source:MGI Symbol;Acc:MGI:1919792]
ENSMUSG00000035139	3.86787e-16	0.249603	0.463	0.321	7.371e-12	Secisbp2	SECIS binding protein 2 [Source:MGI Symbol;Acc:MGI:1922670]
ENSMUSG00000039354	7.90029e-14	0.154863	0.404	0.262	1.50556e-09	Smarcal1	SWI/SNF related matrix associated, actin dependent regulator of chromatin, subfamily a-like 1 [Source:MGI Symbol;Acc:MGI:1859183]
ENSMUSG00000038010	1.55588e-14	0.18945	0.417	0.275	2.96505e-10	Ccdc138	coiled-coil domain containing 138 [Source:MGI Symbol;Acc:MGI:1923388]
ENSMUSG00000029464	2.61461e-16	0.208814	0.403	0.262	4.98266e-12	Gpn3	GPN-loop GTPase 3 [Source:MGI Symbol;Acc:MGI:1289326]
ENSMUSG00000000759	2.53934e-13	0.192376	0.538	0.398	4.83923e-09	Tubgcp3	tubulin, gamma complex associated protein 3 [Source:MGI Symbol;Acc:MGI:2183752]
ENSMUSG00000024231	2.97263e-13	0.169816	0.485	0.345	5.66494e-09	Cul2	cullin 2 [Source:MGI Symbol;Acc:MGI:1918995]
ENSMUSG00000026245	5.23142e-13	0.171033	0.526	0.386	9.96952e-09	Farsb	phenylalanyl-tRNA synthetase, beta subunit [Source:MGI Symbol;Acc:MGI:1346035]
ENSMUSG00000036285	1.51056e-13	0.175948	0.466	0.326	2.87867e-09	Noa1	nitric oxide associated 1 [Source:MGI Symbol;Acc:MGI:1914306]
ENSMUSG00000057147	3.5396e-14	0.221443	0.499	0.359	6.74541e-10	Dph6	diphthamine biosynthesis 6 [Source:MGI Symbol;Acc:MGI:1913882]
ENSMUSG00000034807	8.69063e-15	0.215305	0.466	0.327	1.65617e-10	Colgalt1	collagen beta(1-O)galactosyltransferase 1 [Source:MGI Symbol;Acc:MGI:1924348]
ENSMUSG00000071226	1.73121e-14	0.204941	0.407	0.268	3.29917e-10	Cecr2	CECR2, histone acetyl-lysine reader [Source:MGI Symbol;Acc:MGI:1923799]
ENSMUSG00000022797	3.01495e-15	0.251981	0.451	0.313	5.74558e-11	Tfrc	transferrin receptor [Source:MGI Symbol;Acc:MGI:98822]
ENSMUSG00000026174	8.49015e-12	0.169062	0.527	0.389	1.61797e-07	Cnot9	CCR4-NOT transcription complex, subunit 9 [Source:MGI Symbol;Acc:MGI:1928902]
ENSMUSG00000028221	4.72574e-14	0.198809	0.461	0.323	9.00584e-10	Pip4p2	phosphatidylinositol-4,5-bisphosphate 4-phosphatase 2 [Source:MGI Symbol;Acc:MGI:1919769]
ENSMUSG00000028343	7.02931e-14	0.184781	0.506	0.368	1.33958e-09	Erp44	endoplasmic reticulum protein 44 [Source:MGI Symbol;Acc:MGI:1923549]
ENSMUSG00000041313	9.70926e-13	0.202121	0.468	0.33	1.85029e-08	Slc7a1	solute carrier family 7 (cationic amino acid transporter, y+ system), member 1 [Source:MGI Symbol;Acc:MGI:88117]
ENSMUSG00000018415	1.17334e-12	0.162553	0.474	0.336	2.23604e-08	Gid4	GID complex subunit 4, VID24 homolog [Source:MGI Symbol;Acc:MGI:1914021]
ENSMUSG00000018040	1.45104e-11	0.146101	0.499	0.362	2.76525e-07	Rrp7a	ribosomal RNA processing 7 homolog A [Source:MGI Symbol;Acc:MGI:1922028]
ENSMUSG00000019763	1.28125e-12	0.167162	0.449	0.312	2.44167e-08	Rmnd1	required for meiotic nuclear division 1 homolog [Source:MGI Symbol;Acc:MGI:1913334]
ENSMUSG00000030245	3.80905e-14	0.196883	0.441	0.304	7.25891e-10	Golt1b	golgi transport 1B [Source:MGI Symbol;Acc:MGI:1914214]
ENSMUSG00000051278	2.96637e-13	0.201714	0.475	0.338	5.653e-09	Zgrf1	zinc finger, GRF-type containing 1 [Source:MGI Symbol;Acc:MGI:1918893]
ENSMUSG00000053289	4.34004e-14	0.18211	0.413	0.276	8.27081e-10	Ddx10	DEAD box helicase 10 [Source:MGI Symbol;Acc:MGI:1924841]
ENSMUSG00000001089	4.26229e-12	0.180438	0.504	0.368	8.12265e-08	Luzp1	leucine zipper protein 1 [Source:MGI Symbol;Acc:MGI:107629]
ENSMUSG00000024120	6.84497e-15	0.20328	0.437	0.301	1.30445e-10	Lrpprc	leucine-rich PPR-motif containing [Source:MGI Symbol;Acc:MGI:1919666]
ENSMUSG00000046179	5.90856e-14	0.225421	0.504	0.368	1.12599e-09	E2f8	E2F transcription factor 8 [Source:MGI Symbol;Acc:MGI:1922038]
ENSMUSG00000021824	9.85978e-12	0.132746	0.414	0.278	1.87898e-07	Ap3m1	adaptor-related protein complex 3, mu 1 subunit [Source:MGI Symbol;Acc:MGI:1929212]
ENSMUSG00000024261	7.73422e-12	0.207919	0.475	0.339	1.47391e-07	Syt4	synaptotagmin IV [Source:MGI Symbol;Acc:MGI:101759]
ENSMUSG00000040464	5.96144e-13	0.181283	0.478	0.342	1.13607e-08	Gtpbp10	GTP-binding protein 10 (putative) [Source:MGI Symbol;Acc:MGI:2385599]
ENSMUSG00000054814	1.36237e-13	0.191862	0.408	0.272	2.59626e-09	Usp46	ubiquitin specific peptidase 46 [Source:MGI Symbol;Acc:MGI:1916977]
ENSMUSG00000024513	8.17474e-12	0.161527	0.511	0.376	1.55786e-07	Mbd2	methyl-CpG binding domain protein 2 [Source:MGI Symbol;Acc:MGI:1333813]
ENSMUSG00000024833	4.64465e-11	0.151027	0.488	0.353	8.8513e-07	Pola2	polymerase (DNA directed), alpha 2 [Source:MGI Symbol;Acc:MGI:99690]
ENSMUSG00000027363	7.27872e-12	0.164098	0.468	0.333	1.38711e-07	Usp8	ubiquitin specific peptidase 8 [Source:MGI Symbol;Acc:MGI:1934029]
ENSMUSG00000024158	6.67104e-14	0.178694	0.408	0.273	1.2713e-09	Hagh	hydroxyacyl glutathione hydrolase [Source:MGI Symbol;Acc:MGI:95745]
ENSMUSG00000018669	1.22856e-12	0.164431	0.482	0.348	2.34127e-08	Cdk5rap3	CDK5 regulatory subunit associated protein 3 [Source:MGI Symbol;Acc:MGI:1933126]
ENSMUSG00000029486	3.2612e-12	0.182409	0.531	0.397	6.21486e-08	Mrpl1	mitochondrial ribosomal protein L1 [Source:MGI Symbol;Acc:MGI:2137202]
ENSMUSG00000030168	4.3522e-14	0.205931	0.433	0.299	8.29398e-10	Adipor2	adiponectin receptor 2 [Source:MGI Symbol;Acc:MGI:93830]
ENSMUSG00000034203	3.21537e-12	0.159229	0.466	0.332	6.12753e-08	Chchd4	coiled-coil-helix-coiled-coil-helix domain containing 4 [Source:MGI Symbol;Acc:MGI:1919420]
ENSMUSG00000051730	3.47526e-11	0.147036	0.485	0.351	6.62281e-07	Mettl5	methyltransferase like 5 [Source:MGI Symbol;Acc:MGI:1922672]
ENSMUSG00000006717	5.24299e-13	0.193053	0.524	0.391	9.99156e-09	Acot13	acyl-CoA thioesterase 13 [Source:MGI Symbol;Acc:MGI:1914084]
ENSMUSG00000006763	2.21325e-13	0.179665	0.44	0.307	4.21778e-09	Saal1	serum amyloid A-like 1 [Source:MGI Symbol;Acc:MGI:1926185]
ENSMUSG00000014867	5.4991e-12	0.160532	0.457	0.324	1.04796e-07	Surf4	surfeit gene 4 [Source:MGI Symbol;Acc:MGI:98445]
ENSMUSG00000045257	3.15745e-12	0.172909	0.45	0.317	6.01716e-08	Morn2	MORN repeat containing 2 [Source:MGI Symbol;Acc:MGI:2674071]
ENSMUSG00000047193	1.06429e-12	0.200958	0.501	0.368	2.02821e-08	Dync2h1	dynein cytoplasmic 2 heavy chain 1 [Source:MGI Symbol;Acc:MGI:107736]
ENSMUSG00000063275	1.32693e-12	0.156712	0.401	0.268	2.52873e-08	Hacd1	3-hydroxyacyl-CoA dehydratase 1 [Source:MGI Symbol;Acc:MGI:1353592]
ENSMUSG00000104861	1.54769e-11	0.165927	0.532	0.399	2.94943e-07	3110039M20Rik	RIKEN cDNA 3110039M20 gene [Source:MGI Symbol;Acc:MGI:1914543]
ENSMUSG00000116564	3.13189e-12	0.173518	0.513	0.38	5.96844e-08	Riok2	RIO kinase 2 [Source:MGI Symbol;Acc:MGI:1914295]
ENSMUSG00000028614	3.67197e-13	0.188313	0.475	0.342	6.99767e-09	Ndc1	NDC1 transmembrane nucleoporin [Source:MGI Symbol;Acc:MGI:1920037]
ENSMUSG00000035325	1.01772e-12	0.193972	0.515	0.383	1.93946e-08	Sec31a	Sec31 homolog A (S. cerevisiae) [Source:MGI Symbol;Acc:MGI:1916412]
ENSMUSG00000000561	5.6164e-13	0.186838	0.474	0.342	1.07032e-08	Wdr77	WD repeat domain 77 [Source:MGI Symbol;Acc:MGI:1917715]
ENSMUSG00000037343	3.09292e-10	0.141429	0.506	0.375	5.89419e-06	Taf2	TATA-box binding protein associated factor 2 [Source:MGI Symbol;Acc:MGI:2443028]
ENSMUSG00000005899	3.8863e-12	0.175385	0.47	0.339	7.40613e-08	Smpd4	sphingomyelin phosphodiesterase 4 [Source:MGI Symbol;Acc:MGI:1924876]
ENSMUSG00000027933	3.12554e-11	0.155029	0.454	0.324	5.95634e-07	Ints3	integrator complex subunit 3 [Source:MGI Symbol;Acc:MGI:2140050]
ENSMUSG00000032353	2.29163e-12	0.198137	0.502	0.372	4.36716e-08	Tmed3	transmembrane p24 trafficking protein 3 [Source:MGI Symbol;Acc:MGI:1913361]
ENSMUSG00000034413	1.68177e-11	0.175056	0.522	0.392	3.20496e-07	Neurl1b	neuralized E3 ubiquitin protein ligase 1B [Source:MGI Symbol;Acc:MGI:3643092]
ENSMUSG00000035946	3.4414e-13	0.251281	0.407	0.277	6.55828e-09	Gsx2	GS homeobox 2 [Source:MGI Symbol;Acc:MGI:95843]
ENSMUSG00000000776	5.57203e-12	0.17352	0.487	0.358	1.06186e-07	Polr3d	polymerase (RNA) III (DNA directed) polypeptide D [Source:MGI Symbol;Acc:MGI:1914315]
ENSMUSG00000001445	1.19441e-12	0.165429	0.411	0.282	2.2762e-08	Mrpl10	mitochondrial ribosomal protein L10 [Source:MGI Symbol;Acc:MGI:1333801]
ENSMUSG00000022385	7.68356e-13	0.182367	0.403	0.274	1.46426e-08	Gtse1	G two S phase expressed protein 1 [Source:MGI Symbol;Acc:MGI:1352755]
ENSMUSG00000026095	9.07561e-12	0.173648	0.495	0.366	1.72954e-07	Asnsd1	asparagine synthetase domain containing 1 [Source:MGI Symbol;Acc:MGI:1917646]
ENSMUSG00000030204	4.09469e-11	0.159104	0.514	0.385	7.80326e-07	Ddx47	DEAD box helicase 47 [Source:MGI Symbol;Acc:MGI:1915005]
ENSMUSG00000033285	6.20247e-12	0.1627	0.417	0.288	1.18201e-07	Wdr3	WD repeat domain 3 [Source:MGI Symbol;Acc:MGI:2443143]
ENSMUSG00000002059	2.84066e-12	0.175086	0.433	0.305	5.41345e-08	Rab34	RAB34, member RAS oncogene family [Source:MGI Symbol;Acc:MGI:104606]
ENSMUSG00000005973	5.11559e-12	0.16363	0.401	0.273	9.74879e-08	Rcn1	reticulocalbin 1 [Source:MGI Symbol;Acc:MGI:104559]
ENSMUSG00000021466	9.73344e-14	0.299017	0.48	0.352	1.8549e-09	Ptch1	patched 1 [Source:MGI Symbol;Acc:MGI:105373]
ENSMUSG00000031985	8.34012e-11	0.151304	0.491	0.363	1.58938e-06	Gnpat	glyceronephosphate O-acyltransferase [Source:MGI Symbol;Acc:MGI:1343460]
ENSMUSG00000039768	2.0421e-09	0.126385	0.504	0.376	3.89162e-05	Dnajc11	DnaJ heat shock protein family (Hsp40) member C11 [Source:MGI Symbol;Acc:MGI:2443386]
ENSMUSG00000004393	4.74824e-11	0.137343	0.416	0.289	9.04872e-07	Ddx56	DEAD box helicase 56 [Source:MGI Symbol;Acc:MGI:1277172]
ENSMUSG00000019978	1.41989e-11	0.199188	0.478	0.351	2.70588e-07	Epb41l2	erythrocyte membrane protein band 4.1 like 2 [Source:MGI Symbol;Acc:MGI:103009]
ENSMUSG00000022503	1.08175e-10	0.161554	0.508	0.381	2.06149e-06	Nubp1	nucleotide binding protein 1 [Source:MGI Symbol;Acc:MGI:1347073]
ENSMUSG00000024764	6.52297e-12	0.166998	0.414	0.287	1.24308e-07	Naa40	N(alpha)-acetyltransferase 40, NatD catalytic subunit [Source:MGI Symbol;Acc:MGI:1918249]
ENSMUSG00000026887	2.26091e-10	0.126399	0.451	0.324	4.30863e-06	Mrrf	mitochondrial ribosome recycling factor [Source:MGI Symbol;Acc:MGI:1915121]
ENSMUSG00000041426	6.83642e-12	0.157636	0.409	0.282	1.30282e-07	Hibch	3-hydroxyisobutyryl-Coenzyme A hydrolase [Source:MGI Symbol;Acc:MGI:1923792]
ENSMUSG00000064289	7.86594e-11	0.154412	0.507	0.38	1.49901e-06	Tank	TRAF family member-associated Nf-kappa B activator [Source:MGI Symbol;Acc:MGI:107676]
ENSMUSG00000001524	2.17605e-11	0.153746	0.44	0.314	4.1469e-07	Gtf2h4	general transcription factor II H, polypeptide 4 [Source:MGI Symbol;Acc:MGI:1338799]
ENSMUSG00000021639	1.58093e-09	0.119745	0.441	0.315	3.01278e-05	Gtf2h2	general transcription factor II H, polypeptide 2 [Source:MGI Symbol;Acc:MGI:1345669]
ENSMUSG00000032469	7.5544e-12	0.164702	0.442	0.316	1.43964e-07	Dbr1	debranching RNA lariats 1 [Source:MGI Symbol;Acc:MGI:1931520]
ENSMUSG00000038533	4.77435e-12	0.163402	0.416	0.29	9.09847e-08	Cbfa2t2	CBFA2/RUNX1 translocation partner 2 [Source:MGI Symbol;Acc:MGI:1333833]
ENSMUSG00000041168	2.51894e-11	0.156017	0.491	0.365	4.80034e-07	Lonp1	lon peptidase 1, mitochondrial [Source:MGI Symbol;Acc:MGI:1921392]
ENSMUSG00000005813	1.48118e-11	0.157762	0.407	0.281	2.82268e-07	Metap1	methionyl aminopeptidase 1 [Source:MGI Symbol;Acc:MGI:1922874]
ENSMUSG00000031644	4.17165e-11	0.158096	0.446	0.321	7.94991e-07	Nek1	NIMA (never in mitosis gene a)-related expressed kinase 1 [Source:MGI Symbol;Acc:MGI:97303]
ENSMUSG00000032409	1.14779e-10	0.170418	0.511	0.386	2.18734e-06	Atr	ataxia telangiectasia and Rad3 related [Source:MGI Symbol;Acc:MGI:108028]
ENSMUSG00000043872	3.73305e-12	0.180948	0.439	0.314	7.11407e-08	Zmym1	zinc finger, MYM domain containing 1 [Source:MGI Symbol;Acc:MGI:1915560]
ENSMUSG00000052533	5.82172e-11	0.157728	0.426	0.301	1.10944e-06	Nup188	nucleoporin 188 [Source:MGI Symbol;Acc:MGI:2446190]
ENSMUSG00000053730	5.30561e-11	0.149956	0.439	0.314	1.01109e-06	Tmem39b	transmembrane protein 39b [Source:MGI Symbol;Acc:MGI:2682939]
ENSMUSG00000005470	4.54325e-11	0.187111	0.497	0.373	8.65807e-07	Asf1b	anti-silencing function 1B histone chaperone [Source:MGI Symbol;Acc:MGI:1914179]
ENSMUSG00000028664	6.12167e-13	0.210013	0.478	0.354	1.16661e-08	Ephb2	Eph receptor B2 [Source:MGI Symbol;Acc:MGI:99611]
ENSMUSG00000028677	4.39581e-09	0.132226	0.513	0.389	8.37709e-05	Rnf220	ring finger protein 220 [Source:MGI Symbol;Acc:MGI:1913993]
ENSMUSG00000034274	8.76934e-11	0.147281	0.467	0.343	1.67117e-06	Thoc5	THO complex 5 [Source:MGI Symbol;Acc:MGI:1351333]
ENSMUSG00000036218	2.25565e-11	0.22469	0.423	0.299	4.2986e-07	Pdzrn4	PDZ domain containing RING finger 4 [Source:MGI Symbol;Acc:MGI:3056996]
ENSMUSG00000039183	7.18359e-10	0.130606	0.466	0.342	1.36898e-05	Nubp2	nucleotide binding protein 2 [Source:MGI Symbol;Acc:MGI:1347072]
ENSMUSG00000014496	3.58674e-11	0.185576	0.486	0.363	6.83525e-07	Ankrd28	ankyrin repeat domain 28 [Source:MGI Symbol;Acc:MGI:2145661]
ENSMUSG00000022556	6.97113e-11	0.153679	0.471	0.348	1.32849e-06	Hsf1	heat shock factor 1 [Source:MGI Symbol;Acc:MGI:96238]
ENSMUSG00000025239	2.22026e-09	0.142976	0.513	0.39	4.23115e-05	Limd1	LIM domains containing 1 [Source:MGI Symbol;Acc:MGI:1352502]
ENSMUSG00000028673	1.29789e-12	0.212359	0.492	0.369	2.47338e-08	Fuca1	fucosidase, alpha-L- 1, tissue [Source:MGI Symbol;Acc:MGI:95593]
ENSMUSG00000032615	2.21991e-10	0.137235	0.432	0.309	4.23049e-06	Nt5m	5',3'-nucleotidase, mitochondrial [Source:MGI Symbol;Acc:MGI:1917127]
ENSMUSG00000037991	3.58203e-09	0.138848	0.489	0.366	6.82628e-05	Rmi2	RecQ mediated genome instability 2 [Source:MGI Symbol;Acc:MGI:2685383]
ENSMUSG00000050565	4.63369e-11	0.173163	0.488	0.365	8.83042e-07	Tor1aip2	torsin A interacting protein 2 [Source:MGI Symbol;Acc:MGI:3582695]
ENSMUSG00000066735	7.19183e-10	0.148641	0.515	0.392	1.37055e-05	Vkorc1l1	vitamin K epoxide reductase complex, subunit 1-like 1 [Source:MGI Symbol;Acc:MGI:1916818]
ENSMUSG00000021067	8.59773e-11	0.156747	0.425	0.303	1.63847e-06	Sav1	salvador family WW domain containing 1 [Source:MGI Symbol;Acc:MGI:1927144]
ENSMUSG00000027884	6.18126e-10	0.150861	0.488	0.366	1.17796e-05	Clcc1	chloride channel CLIC-like 1 [Source:MGI Symbol;Acc:MGI:2385186]
ENSMUSG00000033429	2.35295e-11	0.17918	0.505	0.383	4.48401e-07	Mcee	methylmalonyl CoA epimerase [Source:MGI Symbol;Acc:MGI:1920974]
ENSMUSG00000039660	5.94514e-11	0.148903	0.416	0.294	1.13296e-06	Spout1	SPOUT domain containing methyltransferase 1 [Source:MGI Symbol;Acc:MGI:106544]
ENSMUSG00000039841	1.73533e-12	0.217184	0.494	0.372	3.30702e-08	Zfp800	zinc finger protein 800 [Source:MGI Symbol;Acc:MGI:1889334]
ENSMUSG00000044442	1.84097e-09	0.138452	0.427	0.305	3.50834e-05	N6amt1	N-6 adenine-specific DNA methyltransferase 1 (putative) [Source:MGI Symbol;Acc:MGI:1915018]
ENSMUSG00000001632	6.08728e-10	0.15254	0.495	0.374	1.16005e-05	Brpf1	bromodomain and PHD finger containing, 1 [Source:MGI Symbol;Acc:MGI:1926033]
ENSMUSG00000002017	3.8332e-10	0.153735	0.476	0.355	7.30493e-06	Fam98a	family with sequence similarity 98, member A [Source:MGI Symbol;Acc:MGI:1919972]
ENSMUSG00000020888	5.50064e-10	0.144993	0.481	0.36	1.04826e-05	Dvl2	dishevelled segment polarity protein 2 [Source:MGI Symbol;Acc:MGI:106613]
ENSMUSG00000021420	1.72887e-12	0.20502	0.402	0.281	3.2947e-08	Fars2	phenylalanine-tRNA synthetase 2 (mitochondrial) [Source:MGI Symbol;Acc:MGI:1917205]
ENSMUSG00000027327	3.4984e-11	0.163435	0.433	0.312	6.6669e-07	1700037H04Rik	RIKEN cDNA 1700037H04 gene [Source:MGI Symbol;Acc:MGI:1914576]
ENSMUSG00000037108	1.55039e-10	0.180085	0.507	0.386	2.95457e-06	Zcwpw1	zinc finger, CW type with PWWP domain 1 [Source:MGI Symbol;Acc:MGI:2685899]
ENSMUSG00000037531	6.5034e-10	0.135957	0.486	0.365	1.23935e-05	Mrpl47	mitochondrial ribosomal protein L47 [Source:MGI Symbol;Acc:MGI:1921850]
ENSMUSG00000058704	1.39111e-09	0.130049	0.448	0.327	2.65104e-05	Memo1	mediator of cell motility 1 [Source:MGI Symbol;Acc:MGI:1924140]
ENSMUSG00000061731	6.60689e-09	0.140276	0.475	0.354	0.000125907	Ext1	exostosin glycosyltransferase 1 [Source:MGI Symbol;Acc:MGI:894663]
ENSMUSG00000017715	6.56254e-10	0.131516	0.414	0.294	1.25062e-05	Pgs1	phosphatidylglycerophosphate synthase 1 [Source:MGI Symbol;Acc:MGI:1921701]
ENSMUSG00000018239	7.08246e-10	0.135018	0.421	0.302	1.3497e-05	Zcchc10	zinc finger, CCHC domain containing 10 [Source:MGI Symbol;Acc:MGI:1196228]
ENSMUSG00000024873	2.07896e-10	0.152663	0.419	0.3	3.96187e-06	Cnih2	cornichon family AMPA receptor auxiliary protein 2 [Source:MGI Symbol;Acc:MGI:1277225]
ENSMUSG00000025495	3.6868e-10	0.15249	0.476	0.357	7.02594e-06	Ptdss2	phosphatidylserine synthase 2 [Source:MGI Symbol;Acc:MGI:1351664]
ENSMUSG00000027227	4.83901e-11	0.179269	0.446	0.327	9.2217e-07	Sord	sorbitol dehydrogenase [Source:MGI Symbol;Acc:MGI:98266]
ENSMUSG00000030722	5.8593e-11	0.17216	0.449	0.33	1.11661e-06	Nfatc2ip	nuclear factor of activated T cells, cytoplasmic, calcineurin dependent 2 interacting protein [Source:MGI Symbol;Acc:MGI:1329015]
ENSMUSG00000039055	7.69206e-10	0.137758	0.449	0.33	1.46588e-05	Eme1	essential meiotic structure-specific endonuclease 1 [Source:MGI Symbol;Acc:MGI:3576783]
ENSMUSG00000049036	3.69141e-11	0.168841	0.451	0.332	7.03471e-07	Tmem121	transmembrane protein 121 [Source:MGI Symbol;Acc:MGI:1916445]
ENSMUSG00000089911	4.15833e-10	0.148174	0.447	0.328	7.92453e-06	Mfsd14a	major facilitator superfamily domain containing 14A [Source:MGI Symbol;Acc:MGI:1201609]
ENSMUSG00000024018	7.6381e-09	0.124961	0.463	0.345	0.000145559	Ccdc167	coiled-coil domain containing 167 [Source:MGI Symbol;Acc:MGI:1915847]
ENSMUSG00000074212	1.86204e-08	0.134757	0.466	0.348	0.000354849	Dnajb14	DnaJ heat shock protein family (Hsp40) member B14 [Source:MGI Symbol;Acc:MGI:1917854]
ENSMUSG00000020697	9.24712e-10	0.164733	0.487	0.369	1.76222e-05	Lig3	ligase III, DNA, ATP-dependent [Source:MGI Symbol;Acc:MGI:109152]
ENSMUSG00000027710	1.72238e-09	0.123138	0.421	0.303	3.28235e-05	Acad9	acyl-Coenzyme A dehydrogenase family, member 9 [Source:MGI Symbol;Acc:MGI:1914272]
ENSMUSG00000040591	5.16801e-09	0.123441	0.464	0.347	9.84868e-05	1110051M20Rik	RIKEN cDNA 1110051M20 gene [Source:MGI Symbol;Acc:MGI:1915079]
ENSMUSG00000002486	2.81843e-10	0.147621	0.408	0.291	5.37108e-06	Tchp	trichoplein, keratin filament binding [Source:MGI Symbol;Acc:MGI:1925082]
ENSMUSG00000033629	2.11737e-08	0.108228	0.486	0.369	0.000403508	Hacd3	3-hydroxyacyl-CoA dehydratase 3 [Source:MGI Symbol;Acc:MGI:1889341]
ENSMUSG00000040044	2.27125e-10	0.161321	0.487	0.37	4.32832e-06	Orc3	origin recognition complex, subunit 3 [Source:MGI Symbol;Acc:MGI:1354944]
ENSMUSG00000003135	2.76647e-09	0.129748	0.46	0.344	5.27207e-05	Cnot11	CCR4-NOT transcription complex, subunit 11 [Source:MGI Symbol;Acc:MGI:106580]
ENSMUSG00000025178	1.16414e-08	0.126312	0.481	0.365	0.000221849	Pi4k2a	phosphatidylinositol 4-kinase type 2 alpha [Source:MGI Symbol;Acc:MGI:1934031]
ENSMUSG00000027411	6.1766e-10	0.141884	0.426	0.31	1.17707e-05	Vps16	VSP16 CORVET/HOPS core subunit [Source:MGI Symbol;Acc:MGI:2136772]
ENSMUSG00000028688	6.38534e-09	0.127547	0.485	0.369	0.000121685	Toe1	target of EGR1, member 1 (nuclear) [Source:MGI Symbol;Acc:MGI:1915526]
ENSMUSG00000039356	1.0358e-10	0.176724	0.473	0.357	1.97392e-06	Exosc2	exosome component 2 [Source:MGI Symbol;Acc:MGI:2385133]
ENSMUSG00000051232	1.42035e-08	0.117346	0.487	0.371	0.000270676	Tmem199	transmembrane protein 199 [Source:MGI Symbol;Acc:MGI:2144113]
ENSMUSG00000051256	2.86099e-10	0.170512	0.487	0.371	5.45218e-06	Jagn1	jagunal homolog 1 [Source:MGI Symbol;Acc:MGI:1915017]
ENSMUSG00000031813	2.64897e-08	0.106871	0.463	0.348	0.000504815	Mvb12a	multivesicular body subunit 12A [Source:MGI Symbol;Acc:MGI:1920961]
ENSMUSG00000025026	2.24192e-10	0.211309	0.428	0.313	4.27243e-06	Add3	adducin 3 (gamma) [Source:MGI Symbol;Acc:MGI:1351615]
ENSMUSG00000032586	6.60064e-09	0.127138	0.492	0.377	0.000125788	Traip	TRAF-interacting protein [Source:MGI Symbol;Acc:MGI:1096377]
ENSMUSG00000041231	1.05161e-09	0.14955	0.43	0.315	2.00404e-05	Ublcp1	ubiquitin-like domain containing CTD phosphatase 1 [Source:MGI Symbol;Acc:MGI:1933105]
ENSMUSG00000048039	3.26273e-09	0.139351	0.463	0.349	6.21779e-05	Isg20l2	interferon stimulated exonuclease gene 20-like 2 [Source:MGI Symbol;Acc:MGI:2140076]
ENSMUSG00000069806	5.20204e-10	0.149558	0.402	0.288	9.91352e-06	Cacng7	calcium channel, voltage-dependent, gamma subunit 7 [Source:MGI Symbol;Acc:MGI:1932374]
ENSMUSG00000091993	2.93986e-09	0.170928	0.402	0.288	5.60249e-05	B930036N10Rik	RIKEN cDNA B930036N10 gene [Source:MGI Symbol;Acc:MGI:3702496]
ENSMUSG00000001999	1.75383e-09	0.136703	0.421	0.307	3.34228e-05	Blvra	biliverdin reductase A [Source:MGI Symbol;Acc:MGI:88170]
ENSMUSG00000031600	1.07234e-09	0.142435	0.427	0.313	2.04355e-05	Vps37a	vacuolar protein sorting 37A [Source:MGI Symbol;Acc:MGI:1261835]
ENSMUSG00000035392	5.09622e-10	0.16075	0.423	0.309	9.71186e-06	Dennd1a	DENN/MADD domain containing 1A [Source:MGI Symbol;Acc:MGI:2442794]
ENSMUSG00000059939	3.04541e-09	0.131671	0.453	0.339	5.80364e-05	9430015G10Rik	RIKEN cDNA 9430015G10 gene [Source:MGI Symbol;Acc:MGI:2444364]
ENSMUSG00000025878	5.29883e-09	0.146801	0.479	0.366	0.00010098	Uimc1	ubiquitin interaction motif containing 1 [Source:MGI Symbol;Acc:MGI:103185]
ENSMUSG00000026313	2.88763e-09	0.140278	0.439	0.326	5.50295e-05	Hdac4	histone deacetylase 4 [Source:MGI Symbol;Acc:MGI:3036234]
ENSMUSG00000027014	4.47298e-09	0.124649	0.427	0.314	8.52416e-05	Cwc22	CWC22 spliceosome-associated protein [Source:MGI Symbol;Acc:MGI:2136773]
ENSMUSG00000031760	1.89973e-11	0.733597	0.452	0.339	3.62032e-07	Mt3	metallothionein 3 [Source:MGI Symbol;Acc:MGI:97173]
ENSMUSG00000003848	1.44487e-09	0.148879	0.485	0.373	2.75349e-05	Nob1	NIN1/RPN12 binding protein 1 homolog [Source:MGI Symbol;Acc:MGI:1914869]
ENSMUSG00000009112	3.44521e-09	0.124469	0.413	0.301	6.56554e-05	Bcl2l13	BCL2-like 13 (apoptosis facilitator) [Source:MGI Symbol;Acc:MGI:2136959]
ENSMUSG00000027429	1.51708e-09	0.144214	0.439	0.327	2.89109e-05	Sec23b	SEC23 homolog B, COPII coat complex component [Source:MGI Symbol;Acc:MGI:1350925]
ENSMUSG00000040263	1.06923e-08	0.136241	0.48	0.368	0.000203764	Klhdc4	kelch domain containing 4 [Source:MGI Symbol;Acc:MGI:2384569]
ENSMUSG00000031429	5.82942e-09	0.144095	0.499	0.388	0.000111091	Psmd10	proteasome (prosome, macropain) 26S subunit, non-ATPase, 10 [Source:MGI Symbol;Acc:MGI:1858898]
ENSMUSG00000054309	1.48619e-08	0.136951	0.51	0.399	0.000283223	Cpsf3	cleavage and polyadenylation specificity factor 3 [Source:MGI Symbol;Acc:MGI:1859328]
ENSMUSG00000001802	1.53951e-08	0.126597	0.456	0.346	0.000293384	Lrp3	low density lipoprotein receptor-related protein 3 [Source:MGI Symbol;Acc:MGI:3584516]
ENSMUSG00000022114	9.91259e-12	0.268239	0.467	0.357	1.88904e-07	Spry2	sprouty RTK signaling antagonist 2 [Source:MGI Symbol;Acc:MGI:1345138]
ENSMUSG00000029145	1.14512e-08	0.126345	0.468	0.358	0.000218226	Eif2b4	eukaryotic translation initiation factor 2B, subunit 4 delta [Source:MGI Symbol;Acc:MGI:95300]
ENSMUSG00000031458	6.69685e-10	0.163886	0.457	0.347	1.27622e-05	Coprs	coordinator of PRMT5, differentiation stimulator [Source:MGI Symbol;Acc:MGI:1913673]
ENSMUSG00000001034	7.15557e-09	0.127233	0.409	0.299	0.000136364	Mapk7	mitogen-activated protein kinase 7 [Source:MGI Symbol;Acc:MGI:1346347]
ENSMUSG00000022019	1.73283e-08	0.132828	0.487	0.377	0.000330226	Tdrd3	tudor domain containing 3 [Source:MGI Symbol;Acc:MGI:2444023]
ENSMUSG00000024896	2.07308e-08	0.124932	0.428	0.318	0.000395067	Minpp1	multiple inositol polyphosphate histidine phosphatase 1 [Source:MGI Symbol;Acc:MGI:1336159]
ENSMUSG00000024947	3.12879e-09	0.143694	0.493	0.383	5.96254e-05	Men1	multiple endocrine neoplasia 1 [Source:MGI Symbol;Acc:MGI:1316736]
ENSMUSG00000027263	2.9297e-08	0.135792	0.47	0.36	0.000558313	Tubgcp4	tubulin, gamma complex associated protein 4 [Source:MGI Symbol;Acc:MGI:1196293]
ENSMUSG00000029071	2.99905e-09	0.138666	0.407	0.297	5.7153e-05	Dvl1	dishevelled segment polarity protein 1 [Source:MGI Symbol;Acc:MGI:94941]
ENSMUSG00000029782	1.80373e-09	0.141766	0.414	0.304	3.43737e-05	Tmem209	transmembrane protein 209 [Source:MGI Symbol;Acc:MGI:1919899]
ENSMUSG00000031983	2.60176e-10	0.203384	0.472	0.362	4.95817e-06	2310022B05Rik	RIKEN cDNA 2310022B05 gene [Source:MGI Symbol;Acc:MGI:1916801]
ENSMUSG00000032264	1.91498e-08	0.131605	0.483	0.373	0.000364938	Zw10	zw10 kinetochore protein [Source:MGI Symbol;Acc:MGI:1349478]
ENSMUSG00000055639	7.77735e-10	0.177809	0.437	0.327	1.48213e-05	Dach1	dachshund family transcription factor 1 [Source:MGI Symbol;Acc:MGI:1277991]
ENSMUSG00000000131	8.51925e-08	0.119288	0.461	0.352	0.00162351	Xpo6	exportin 6 [Source:MGI Symbol;Acc:MGI:2429950]
ENSMUSG00000014771	3.33786e-08	0.124458	0.463	0.354	0.000636095	Pdcd2	programmed cell death 2 [Source:MGI Symbol;Acc:MGI:104643]
ENSMUSG00000028127	1.65852e-08	0.13478	0.468	0.359	0.000316064	Abcd3	ATP-binding cassette, sub-family D (ALD), member 3 [Source:MGI Symbol;Acc:MGI:1349216]
ENSMUSG00000053329	2.11599e-08	0.132208	0.468	0.359	0.000403244	Gatd3a	glutamine amidotransferase like class 1 domain containing 3A [Source:MGI Symbol;Acc:MGI:1351861]
ENSMUSG00000021720	1.06388e-09	0.171606	0.469	0.36	2.02744e-05	Rnf180	ring finger protein 180 [Source:MGI Symbol;Acc:MGI:1919066]
ENSMUSG00000022422	5.62516e-08	0.138573	0.494	0.385	0.00107199	Dscc1	DNA replication and sister chromatid cohesion 1 [Source:MGI Symbol;Acc:MGI:1919357]
ENSMUSG00000029265	3.30085e-08	0.123815	0.498	0.389	0.000629043	Dr1	down-regulator of transcription 1 [Source:MGI Symbol;Acc:MGI:1100515]
ENSMUSG00000034064	1.21116e-09	0.156379	0.438	0.329	2.30811e-05	Poglut1	protein O-glucosyltransferase 1 [Source:MGI Symbol;Acc:MGI:2444232]
ENSMUSG00000037905	6.74857e-09	0.138977	0.449	0.34	0.000128607	Bri3bp	Bri3 binding protein [Source:MGI Symbol;Acc:MGI:1924059]
ENSMUSG00000052369	4.81518e-09	0.149503	0.489	0.38	9.17629e-05	Tmem106c	transmembrane protein 106C [Source:MGI Symbol;Acc:MGI:1196384]
ENSMUSG00000068329	1.30571e-08	0.131233	0.437	0.328	0.000248829	Htra2	HtrA serine peptidase 2 [Source:MGI Symbol;Acc:MGI:1928676]
ENSMUSG00000079470	2.19698e-09	0.202611	0.496	0.387	4.18679e-05	Utp14b	UTP14B small subunit processome component [Source:MGI Symbol;Acc:MGI:2445092]
ENSMUSG00000022671	1.03283e-07	0.112369	0.461	0.353	0.00196826	Mzt2	mitotic spindle organizing protein 2 [Source:MGI Symbol;Acc:MGI:1922845]
ENSMUSG00000024212	3.0466e-08	0.114848	0.432	0.324	0.000580591	Mllt1	myeloid/lymphoid or mixed-lineage leukemia; translocated to, 1 [Source:MGI Symbol;Acc:MGI:1927238]
ENSMUSG00000025050	3.06234e-08	0.11733	0.423	0.315	0.000583591	Pcgf6	polycomb group ring finger 6 [Source:MGI Symbol;Acc:MGI:1918291]
ENSMUSG00000029090	2.74375e-08	0.128886	0.442	0.334	0.000522877	Adgra3	adhesion G protein-coupled receptor A3 [Source:MGI Symbol;Acc:MGI:1917943]
ENSMUSG00000037214	4.89619e-09	0.145507	0.419	0.311	9.33067e-05	Thap1	THAP domain containing, apoptosis associated protein 1 [Source:MGI Symbol;Acc:MGI:1921004]
ENSMUSG00000039765	3.50678e-09	0.154223	0.401	0.294	6.68287e-05	Cc2d2a	coiled-coil and C2 domain containing 2A [Source:MGI Symbol;Acc:MGI:1924487]
ENSMUSG00000012076	9.91888e-08	0.114717	0.469	0.362	0.00189024	Brms1l	breast cancer metastasis-suppressor 1-like [Source:MGI Symbol;Acc:MGI:1196337]
ENSMUSG00000025858	3.22996e-09	0.164691	0.492	0.385	6.15533e-05	Get4	golgi to ER traffic protein 4 [Source:MGI Symbol;Acc:MGI:1914854]
ENSMUSG00000029029	6.10224e-09	0.135967	0.449	0.342	0.00011629	Wrap73	WD repeat containing, antisense to Trp73 [Source:MGI Symbol;Acc:MGI:1891749]
ENSMUSG00000000378	4.87627e-08	0.115297	0.454	0.348	0.00092927	Ccm2	cerebral cavernous malformation 2 [Source:MGI Symbol;Acc:MGI:2384924]
ENSMUSG00000020946	9.07417e-09	0.132296	0.406	0.3	0.000172927	Gosr2	golgi SNAP receptor complex member 2 [Source:MGI Symbol;Acc:MGI:1927204]
ENSMUSG00000039176	1.55038e-08	0.139765	0.451	0.345	0.000295455	Polg	polymerase (DNA directed), gamma [Source:MGI Symbol;Acc:MGI:1196389]
ENSMUSG00000027341	4.74304e-09	0.158357	0.482	0.376	9.03881e-05	Tmem230	transmembrane protein 230 [Source:MGI Symbol;Acc:MGI:1917862]
ENSMUSG00000004768	6.14043e-08	0.119887	0.438	0.333	0.00117018	Rab23	RAB23, member RAS oncogene family [Source:MGI Symbol;Acc:MGI:99833]
ENSMUSG00000026492	2.89216e-08	0.125283	0.419	0.314	0.00055116	Tfb2m	transcription factor B2, mitochondrial [Source:MGI Symbol;Acc:MGI:107937]
ENSMUSG00000037443	4.49469e-08	0.129579	0.414	0.309	0.000856553	Cep85	centrosomal protein 85 [Source:MGI Symbol;Acc:MGI:1917262]
ENSMUSG00000024286	1.92225e-07	0.12279	0.492	0.388	0.00366323	Ccny	cyclin Y [Source:MGI Symbol;Acc:MGI:1915224]
ENSMUSG00000029613	8.16293e-07	0.10567	0.484	0.38	0.0155561	Eif2ak1	eukaryotic translation initiation factor 2 alpha kinase 1 [Source:MGI Symbol;Acc:MGI:1353448]
ENSMUSG00000035941	1.0968e-07	0.116973	0.438	0.334	0.00209017	Ibtk	inhibitor of Bruton agammaglobulinemia tyrosine kinase [Source:MGI Symbol;Acc:MGI:1918677]
ENSMUSG00000066839	1.56207e-07	0.112514	0.438	0.334	0.00297684	Ecsit	ECSIT signalling integrator [Source:MGI Symbol;Acc:MGI:1349469]
ENSMUSG00000079659	3.96115e-07	0.120849	0.502	0.398	0.00754876	Tmem243	transmembrane protein 243, mitochondrial [Source:MGI Symbol;Acc:MGI:3606159]
ENSMUSG00000023156	1.17499e-07	0.12889	0.499	0.396	0.00223919	Rpp14	ribonuclease P 14 subunit [Source:MGI Symbol;Acc:MGI:1914303]
ENSMUSG00000026848	2.1518e-07	0.110697	0.412	0.309	0.00410068	Tor1b	torsin family 1, member B [Source:MGI Symbol;Acc:MGI:1353605]
ENSMUSG00000032386	3.42617e-08	0.112265	0.409	0.306	0.000652926	Trip4	thyroid hormone receptor interactor 4 [Source:MGI Symbol;Acc:MGI:1928469]
ENSMUSG00000021519	3.01553e-07	0.104904	0.402	0.3	0.0057467	Mterf3	mitochondrial transcription termination factor 3 [Source:MGI Symbol;Acc:MGI:1913660]
ENSMUSG00000029703	6.42308e-08	0.131463	0.451	0.349	0.00122405	Lrwd1	leucine-rich repeats and WD repeat domain containing 1 [Source:MGI Symbol;Acc:MGI:1918985]
ENSMUSG00000030602	6.81701e-07	0.105558	0.461	0.359	0.0129912	Pak4	p21 (RAC1) activated kinase 4 [Source:MGI Symbol;Acc:MGI:1917834]
ENSMUSG00000024327	2.31766e-07	0.114418	0.44	0.338	0.00441676	Slc39a7	solute carrier family 39 (zinc transporter), member 7 [Source:MGI Symbol;Acc:MGI:95909]
ENSMUSG00000024570	2.73833e-07	0.110234	0.442	0.34	0.00521843	Rbfa	ribosome binding factor A [Source:MGI Symbol;Acc:MGI:1915981]
ENSMUSG00000001366	1.16558e-06	0.109322	0.455	0.354	0.0222125	Fbxo9	f-box protein 9 [Source:MGI Symbol;Acc:MGI:1918788]
ENSMUSG00000025217	7.78655e-08	0.117668	0.402	0.301	0.00148388	Btrc	beta-transducin repeat containing protein [Source:MGI Symbol;Acc:MGI:1338871]
ENSMUSG00000034329	5.88309e-08	0.137801	0.458	0.357	0.00112114	Brip1	BRCA1 interacting protein C-terminal helicase 1 [Source:MGI Symbol;Acc:MGI:2442836]
ENSMUSG00000040029	1.45735e-07	0.12694	0.459	0.358	0.00277727	Ipo8	importin 8 [Source:MGI Symbol;Acc:MGI:2444611]
ENSMUSG00000028114	1.2641e-07	0.117748	0.412	0.311	0.002409	Mettl14	methyltransferase like 14 [Source:MGI Symbol;Acc:MGI:2442926]
ENSMUSG00000037938	6.30704e-08	0.128001	0.482	0.381	0.00120193	Chchd5	coiled-coil-helix-coiled-coil-helix domain containing 5 [Source:MGI Symbol;Acc:MGI:1913420]
ENSMUSG00000039844	2.08263e-07	0.102586	0.428	0.327	0.00396887	Rapgef1	Rap guanine nucleotide exchange factor (GEF) 1 [Source:MGI Symbol;Acc:MGI:104580]
ENSMUSG00000051329	7.69063e-08	0.132737	0.427	0.326	0.0014656	Nup160	nucleoporin 160 [Source:MGI Symbol;Acc:MGI:1926227]
ENSMUSG00000024687	1.09361e-06	0.1069	0.445	0.345	0.0208409	Osbp	oxysterol binding protein [Source:MGI Symbol;Acc:MGI:97447]
ENSMUSG00000031902	3.18429e-07	0.108598	0.406	0.306	0.0060683	Nfatc3	nuclear factor of activated T cells, cytoplasmic, calcineurin dependent 3 [Source:MGI Symbol;Acc:MGI:103296]
ENSMUSG00000040414	2.87801e-07	0.117558	0.454	0.354	0.00548462	Slc25a28	solute carrier family 25, member 28 [Source:MGI Symbol;Acc:MGI:2180509]
ENSMUSG00000055675	7.97594e-08	0.148447	0.403	0.303	0.00151998	Kbtbd11	kelch repeat and BTB (POZ) domain containing 11 [Source:MGI Symbol;Acc:MGI:1922151]
ENSMUSG00000005204	9.71018e-07	0.10385	0.48	0.38	0.0185047	Senp3	SUMO/sentrin specific peptidase 3 [Source:MGI Symbol;Acc:MGI:2158736]
ENSMUSG00000022120	7.78027e-07	0.113338	0.496	0.396	0.0148269	Obi1	ORC ubiquitin ligase 1 [Source:MGI Symbol;Acc:MGI:1919736]
ENSMUSG00000064030	7.72012e-08	0.127677	0.477	0.377	0.00147122	Pym1	PYM homolog 1, exon junction complex associated factor [Source:MGI Symbol;Acc:MGI:1925678]
ENSMUSG00000026097	2.7083e-08	0.142727	0.459	0.36	0.000516121	Ormdl1	ORM1-like 1 (S. cerevisiae) [Source:MGI Symbol;Acc:MGI:2181669]
ENSMUSG00000038002	8.49732e-07	0.11214	0.455	0.356	0.0161933	Cramp1	cramped chromatin regulator 1 [Source:MGI Symbol;Acc:MGI:1930190]
ENSMUSG00000023021	5.20941e-07	0.117994	0.479	0.38	0.00992757	Cers5	ceramide synthase 5 [Source:MGI Symbol;Acc:MGI:1919199]
ENSMUSG00000025912	4.42997e-07	0.122402	0.435	0.336	0.00844219	Mybl1	myeloblastosis oncogene-like 1 [Source:MGI Symbol;Acc:MGI:99925]
ENSMUSG00000033272	5.53026e-08	0.123016	0.416	0.317	0.0010539	Slc35a4	solute carrier family 35, member A4 [Source:MGI Symbol;Acc:MGI:1915093]
ENSMUSG00000018169	3.27072e-07	0.131042	0.437	0.339	0.00623301	Mfng	MFNG O-fucosylpeptide 3-beta-N-acetylglucosaminyltransferase [Source:MGI Symbol;Acc:MGI:1095404]
ENSMUSG00000026803	1.07134e-06	0.10434	0.407	0.309	0.0204165	Ttf1	transcription termination factor, RNA polymerase I [Source:MGI Symbol;Acc:MGI:105044]
ENSMUSG00000021266	5.80255e-07	0.105405	0.403	0.306	0.0110579	Wars	tryptophanyl-tRNA synthetase [Source:MGI Symbol;Acc:MGI:104630]
ENSMUSG00000018322	4.00466e-07	0.1191	0.482	0.385	0.00763168	Tomm34	translocase of outer mitochondrial membrane 34 [Source:MGI Symbol;Acc:MGI:1914395]
ENSMUSG00000025060	2.16071e-06	0.108103	0.483	0.386	0.0411767	Slk	STE20-like kinase [Source:MGI Symbol;Acc:MGI:103241]
ENSMUSG00000027285	2.2701e-06	0.105105	0.496	0.399	0.0432613	Haus2	HAUS augmin-like complex, subunit 2 [Source:MGI Symbol;Acc:MGI:1913546]
ENSMUSG00000031262	2.3473e-07	0.122714	0.435	0.338	0.00447326	Cenpi	centromere protein I [Source:MGI Symbol;Acc:MGI:2147897]
ENSMUSG00000038936	2.12135e-06	0.102774	0.472	0.375	0.0404265	Sccpdh	saccharopine dehydrogenase (putative) [Source:MGI Symbol;Acc:MGI:1924486]
ENSMUSG00000022020	1.31072e-07	0.145856	0.441	0.345	0.00249784	Naa16	N(alpha)-acetyltransferase 16, NatA auxiliary subunit [Source:MGI Symbol;Acc:MGI:1914147]
ENSMUSG00000022561	4.10094e-07	0.115106	0.42	0.324	0.00781516	Gpaa1	GPI anchor attachment protein 1 [Source:MGI Symbol;Acc:MGI:1202392]
ENSMUSG00000029125	9.80784e-07	0.105171	0.411	0.315	0.0186908	Stx18	syntaxin 18 [Source:MGI Symbol;Acc:MGI:1918366]
ENSMUSG00000038766	1.0217e-06	0.117639	0.475	0.379	0.0194705	Gabpb2	GA repeat binding protein, beta 2 [Source:MGI Symbol;Acc:MGI:95612]
ENSMUSG00000041035	1.31598e-07	0.144897	0.435	0.339	0.00250786	Dpcd	deleted in primary ciliary dyskinesia [Source:MGI Symbol;Acc:MGI:1924407]
ENSMUSG00000042616	9.79422e-08	0.132083	0.423	0.327	0.00186648	Oscp1	organic solute carrier partner 1 [Source:MGI Symbol;Acc:MGI:1916308]
ENSMUSG00000048234	5.26404e-07	0.122212	0.414	0.318	0.0100317	Rnf149	ring finger protein 149 [Source:MGI Symbol;Acc:MGI:2677438]
ENSMUSG00000052539	1.46286e-07	0.132201	0.42	0.324	0.00278778	Magi3	membrane associated guanylate kinase, WW and PDZ domain containing 3 [Source:MGI Symbol;Acc:MGI:1923484]
ENSMUSG00000022160	3.77287e-07	0.114211	0.406	0.311	0.00718996	Mettl3	methyltransferase like 3 [Source:MGI Symbol;Acc:MGI:1927165]
ENSMUSG00000024597	6.68818e-07	0.128223	0.463	0.368	0.0127457	Slc12a2	solute carrier family 12, member 2 [Source:MGI Symbol;Acc:MGI:101924]
ENSMUSG00000022601	6.1682e-07	0.12555	0.424	0.329	0.0117547	Zbtb11	zinc finger and BTB domain containing 11 [Source:MGI Symbol;Acc:MGI:2443876]
ENSMUSG00000042167	2.35867e-07	0.121376	0.485	0.39	0.00449492	Tent2	terminal nucleotidyltransferase 2 [Source:MGI Symbol;Acc:MGI:2140950]
ENSMUSG00000054836	1.41991e-06	0.109485	0.471	0.376	0.0270592	Elp6	elongator acetyltransferase complex subunit 6 [Source:MGI Symbol;Acc:MGI:1919349]
ENSMUSG00000025157	7.33481e-07	0.106074	0.402	0.308	0.0139779	Zdhhc16	zinc finger, DHHC domain containing 16 [Source:MGI Symbol;Acc:MGI:1921418]
ENSMUSG00000063802	3.13351e-07	0.128335	0.438	0.344	0.00597154	Hspbp1	HSPA (heat shock 70kDa) binding protein, cytoplasmic cochaperone 1 [Source:MGI Symbol;Acc:MGI:1913495]
ENSMUSG00000021371	8.18837e-08	0.150169	0.43	0.336	0.00156046	Mcur1	mitochondrial calcium uniporter regulator 1 [Source:MGI Symbol;Acc:MGI:1923387]
ENSMUSG00000043207	2.68806e-07	0.129579	0.409	0.315	0.00512263	Zmpste24	zinc metallopeptidase, STE24 [Source:MGI Symbol;Acc:MGI:1890508]
ENSMUSG00000029722	5.09098e-07	0.117238	0.407	0.314	0.00970188	Agfg2	ArfGAP with FG repeats 2 [Source:MGI Symbol;Acc:MGI:2443267]
ENSMUSG00000003166	1.02367e-06	0.119426	0.471	0.379	0.0195081	Dgcr2	DiGeorge syndrome critical region gene 2 [Source:MGI Symbol;Acc:MGI:892866]
ENSMUSG00000038178	8.51948e-07	0.126126	0.412	0.321	0.0162356	Slc43a2	solute carrier family 43, member 2 [Source:MGI Symbol;Acc:MGI:2442746]
ENSMUSG00000015714	6.80927e-07	0.14989	0.449	0.359	0.0129764	Cers2	ceramide synthase 2 [Source:MGI Symbol;Acc:MGI:1924143]
ENSMUSG00000038344	2.13821e-06	0.118882	0.458	0.368	0.0407479	Txlng	taxilin gamma [Source:MGI Symbol;Acc:MGI:3590652]
ENSMUSG00000058690	3.91484e-07	0.146277	0.452	0.362	0.00746051	Ccser2	coiled-coil serine rich 2 [Source:MGI Symbol;Acc:MGI:101859]
ENSMUSG00000003680	8.01438e-07	0.117598	0.413	0.323	0.015273	Taf6l	TATA-box binding protein associated factor 6 like [Source:MGI Symbol;Acc:MGI:2444957]
ENSMUSG00000022008	7.66914e-07	0.111995	0.411	0.321	0.0146151	Gpalpp1	GPALPP motifs containing 1 [Source:MGI Symbol;Acc:MGI:1914717]
ENSMUSG00000056153	1.94785e-06	0.125722	0.479	0.389	0.0371201	Socs6	suppressor of cytokine signaling 6 [Source:MGI Symbol;Acc:MGI:1924885]
ENSMUSG00000026575	5.78054e-07	0.1369	0.404	0.315	0.011016	Nme7	NME/NM23 family member 7 [Source:MGI Symbol;Acc:MGI:2449121]
ENSMUSG00000028470	2.46991e-06	0.133434	0.478	0.396	0.047069	Hint2	histidine triad nucleotide binding protein 2 [Source:MGI Symbol;Acc:MGI:1916167]

## Sheet: g.Profiler_DCXLow
g.Profiler : Functional profiling of DCXLow cells
source	term_name	term_id	adjusted_p_value	negative_log10_of_adjusted_p_value	term_size	query_size	intersection_size	effective_domain_size	intersections
REAC	Metabolism of RNA	REAC:R-MMU-8953854	2.1519e-05	4.66718	531	305	44	8710	ZFP36L1,EXOSC1,EXOSC5,FTSJ3,WDR75,GTF2F2,WDR46,GEMIN6,PNO1,NUP205,RRP9,BOP1,MAPKAPK2,PPIL3,GEMIN2,POLR2L,PSME3,LTV1,UTP6,NOC4L,CPSF1,ISY1,PES1,UTP15,PRPF3,CNOT9,RRP7A,RIOK2,NDC1,WDR77,DDX47,WDR3,GTF2H4,GTF2H2,NUP188,CNOT11,EXOSC2,CWC22,NOB1,PSMD10,CPSF3,METTL14,NUP160,SENP3
REAC	Major pathway of rRNA processing in the nucleolus and cytosol	REAC:R-MMU-6791226	0.000438365	3.35816	166	305	20	8710	EXOSC1,EXOSC5,FTSJ3,WDR75,WDR46,PNO1,RRP9,BOP1,LTV1,UTP6,NOC4L,PES1,UTP15,RRP7A,RIOK2,DDX47,WDR3,EXOSC2,NOB1,SENP3
REAC	rRNA processing	REAC:R-MMU-72312	0.000438365	3.35816	166	305	20	8710	EXOSC1,EXOSC5,FTSJ3,WDR75,WDR46,PNO1,RRP9,BOP1,LTV1,UTP6,NOC4L,PES1,UTP15,RRP7A,RIOK2,DDX47,WDR3,EXOSC2,NOB1,SENP3
REAC	rRNA processing in the nucleus and cytosol	REAC:R-MMU-8868773	0.000438365	3.35816	166	305	20	8710	EXOSC1,EXOSC5,FTSJ3,WDR75,WDR46,PNO1,RRP9,BOP1,LTV1,UTP6,NOC4L,PES1,UTP15,RRP7A,RIOK2,DDX47,WDR3,EXOSC2,NOB1,SENP3
REAC	HDR through Homologous Recombination (HRR)	REAC:R-MMU-5685942	0.000850205	3.07048	55	305	11	8710	RPA1,ATM,SPIDR,GEN1,POLE2,MRE11A,DNA2,RAD1,RMI2,EME1,BRIP1
REAC	Resolution of D-loop Structures through Holliday Junction Intermediates	REAC:R-MMU-5693568	0.00120709	2.91826	28	305	8	8710	ATM,SPIDR,GEN1,MRE11A,DNA2,RMI2,EME1,BRIP1
REAC	Resolution of D-Loop Structures	REAC:R-MMU-5693537	0.00120709	2.91826	28	305	8	8710	ATM,SPIDR,GEN1,MRE11A,DNA2,RMI2,EME1,BRIP1
REAC	Cell Cycle	REAC:R-MMU-1640170	0.00355213	2.44951	558	305	40	8710	RPA1,CCNE1,CDK2,CCND3,ATM,NUP205,GORASP2,E2F4,HAUS7,BABAM2,CDC6,PTTG1,CEP43,PSME3,CEP78,POLE2,CDT1,MRE11A,E2F2,E2F5,LPIN2,DNA2,RAD1,TUBGCP3,POLA2,NDC1,GTSE1,NUP188,ANKRD28,RMI2,ORC3,PSMD10,TUBGCP4,ZW10,DSCC1,MZT2,BRIP1,NUP160,HAUS2,CENPI
REAC	HDR through Single Strand Annealing (SSA)	REAC:R-MMU-5685938	0.0168065	1.77452	29	305	7	8710	RPA1,ATM,MRE11A,DNA2,RAD1,RMI2,BRIP1
REAC	Activation of the pre-replicative complex	REAC:R-MMU-68962	0.0168065	1.77452	29	305	7	8710	RPA1,CDK2,CDC6,POLE2,CDT1,POLA2,ORC3
REAC	Metabolism of nucleotides	REAC:R-MMU-15869	0.0279963	1.5529	92	305	12	8710	ADK,CAD,DNPH1,NME4,GSR,UCK2,PPAT,ATIC,ADSL,NUDT1,PFAS,NT5M
REAC	HDR through Homologous Recombination (HRR) or Single Strand Annealing (SSA)	REAC:R-MMU-5693567	0.0300305	1.52244	107	305	13	8710	RPA1,CDK2,ATM,BABAM2,SPIDR,GEN1,POLE2,MRE11A,DNA2,RAD1,RMI2,EME1,BRIP1
REAC	Mitotic G1 phase and G1/S transition	REAC:R-MMU-453279	0.0395553	1.4028	125	305	14	8710	RPA1,CCNE1,CDK2,CCND3,E2F4,CDC6,PSME3,POLE2,CDT1,E2F2,E2F5,POLA2,ORC3,PSMD10
REAC	Nucleotide biosynthesis	REAC:R-MMU-8956320	0.0397785	1.40035	15	305	5	8710	CAD,PPAT,ATIC,ADSL,PFAS
REAC	Homology Directed Repair	REAC:R-MMU-5693538	0.0400089	1.39784	110	305	13	8710	RPA1,CDK2,ATM,BABAM2,SPIDR,GEN1,POLE2,MRE11A,DNA2,RAD1,RMI2,EME1,BRIP1
REAC	Presynaptic phase of homologous DNA pairing and strand exchange	REAC:R-MMU-5693616	0.0407814	1.38954	33	305	7	8710	RPA1,ATM,MRE11A,DNA2,RAD1,RMI2,BRIP1
